# Supplementary material for: The zinc-finger protein Red1 orchestrates MTREC submodules and binds the Mtl1 helicase arch domain
Source: Springer Nature journal article supplement (doi:10.1038/s41467-021-23565-3), 2021-06-08
Supplement: MOESM1 [file 41467_2021_23565_MOESM1_ESM.pdf]

## SUPPLEMENTARY INFORMATION

### **The zinc-finger protein Red1 orchestrates MTREC submodules and binds the Mtl1 helicase arch domain**

Nikolay Dobrev<sup>1</sup>, Yasar Luqman Ahmed<sup>1</sup>, Anusree Sivadas<sup>2</sup>, Komal Soni<sup>1</sup>, Tamás Fischer<sup>1,2\*</sup>, Irmgard Sinning<sup>1\*</sup>

<sup>1</sup>Heidelberg University Biochemistry Center (BZH), INF 328, D-69120 Heidelberg, Germany

<sup>2</sup>The John Curtin School of Medical Research, The Australian National University, Canberra, ACT 2601, Australia

\* Correspondence should be addressed to Irmgard Sinning ([irmi.sinning@bzh.uni-heidelberg.de](mailto:irmi.sinning@bzh.uni-heidelberg.de)) or Tamás Fischer ([tamas.fischer@anu.edu.au](mailto:tamas.fischer@anu.edu.au))

#### **Content:**

Supplementary figures 1 to 15

Supplementary tables 1 to 3

Supplementary references 1 to 13

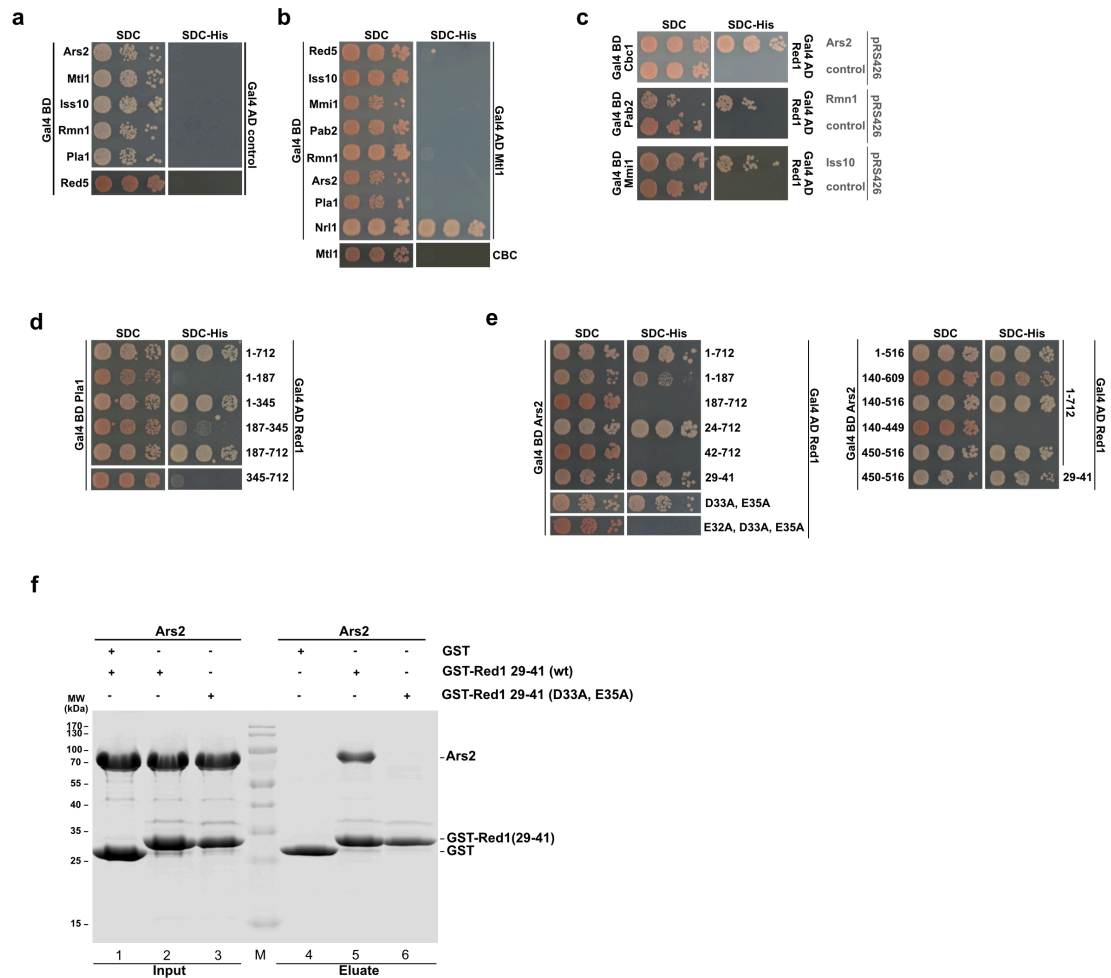

## Supplementary Figure 1 Analysis of interactions between MTREC components

**a** Auto-activation controls for the interactions presented in Fig. 1b. **b** Y2H experiments showing no interaction between Mtl1 and the other MTREC subunits. Nrl1 is used as positive control. Nrl1 interacts with Mtl1 and Ctr1 to form the CNM complex<sup>1,2</sup>. **c** Ars2 bridges Cbc1 and Red1 in Y3H analysis. Similarly, Pab2 and Mmi1 interact with Red1 in presence of Rmn1 and Iss10, respectively. **d** Pla1 interacts with various Red1 truncation variants. **e** Ars2 interacts with various Red1 truncation variants (left panel), and Ars2 truncation variants with Red1 (right panel). **f** Coomassie stained SDS-PAGE of an *in vitro* GST pull-down assay with the Red1 peptide (residues 29 to 41) and Ars2. The Red1 double mutant (D33A, E35A) does not interact with Ars2.

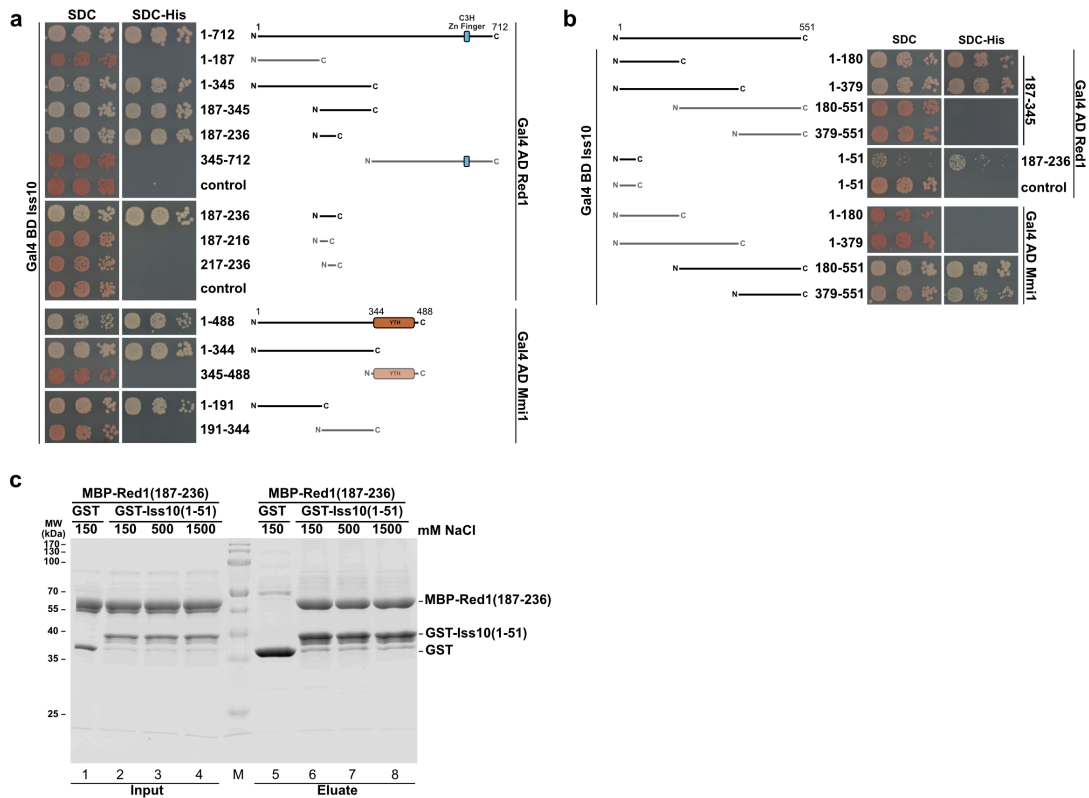

## Supplementary Figure 2 Analysis of interactions between the Mmi1-Iss10 submodule and Red1

**a, b** Y2H analysis of the Mmi1-Iss10 and Red1 interaction. Using Red1, Iss10 and Mmi1 truncation variants, the interacting regions were narrowed down to Iss10 (residues 379 to 551) and Mmi1 (residues 1 to 191) in the Mmi1-Iss10 submodule, and to Red1 (residues 187 to 236) and Iss10 (residues 1 to 51). **(c)** Coomassie stained SDS-PAGE of an *in vitro* GST pull-down assay with MBP-Red1 (residues 187 to 236) and GST-Iss10 (residues 1 to 51). The Iss10 N-terminal region interacts with the Red1 truncation variant, and this interaction is stable under high salt conditions (1.5 M NaCl).

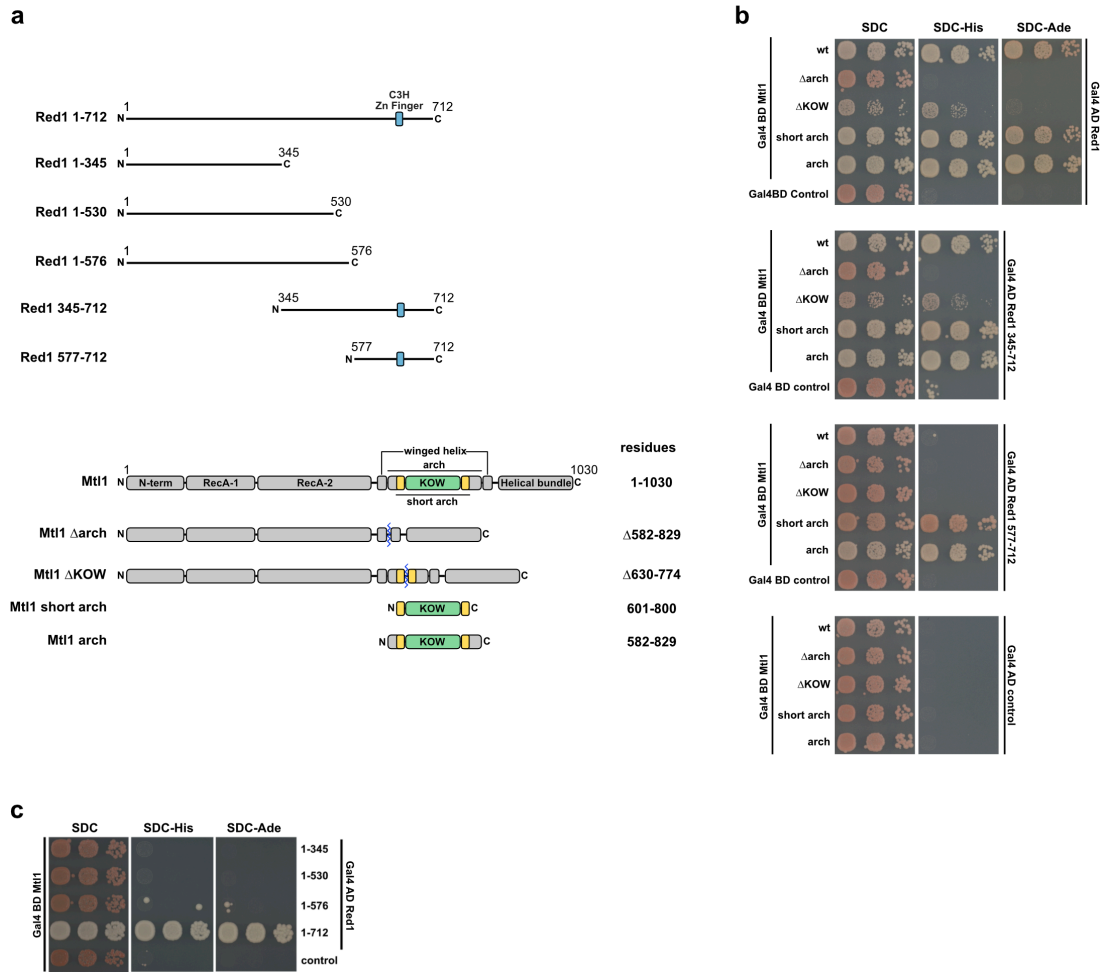

**Supplementary Figure 3 Analysis of interactions between Red1 and Mtl1**  
**a** Scheme of Red1 and Mtl1 variants used in Y2H analyses. **b** Y2H analysis of Mtl1 and Red1 truncation variants. The Mtl1  $\Delta$ KOW domain shows much weaker interaction with Red1 compared to the arch domain indicated by slow growth on SDC-His and no growth on SDC-Ade. **c** Y2H analysis of Mtl1 and Red1 N-terminal truncation variants. Gal4 BD, DNA binding domain; Gal4 AD, activation domain; SDC-Leu-Trp (SDC), SDC-Leu-Trp-His (SDC-His) and SDC-Leu-Trp-Ade (SDC-Ade).

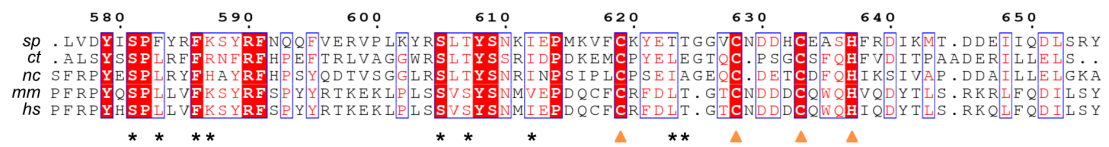

### Supplementary Figure 4 Multiple sequence alignment of the conserved Red1 C-terminal region

Sequences from *Chaetomium thermophilum* (*ct*) – *ctRed1* (Uniprot ID: G0S1V1, see Supplementary Figure 12), *Schizosaccharomyces pombe* (*sp*) – *spRed1* (Uniprot ID: Q9UTR8), *Neurospora crassa* (*nc*) – *ncRed1* (Uniprot ID: V51R63), *Mus musculus* (*mm*) – *mmZfc3h1* (Uniprot ID: B2RT41) and *Homo sapiens* (*hs*) - *hsZFC3H1* (Uniprot ID: O60293). Fully conserved residues are highlighted in red. Residues selected for mutational analysis are marked with an asterisk. Orange arrowheads indicate residues involved in Zinc-finger formation.

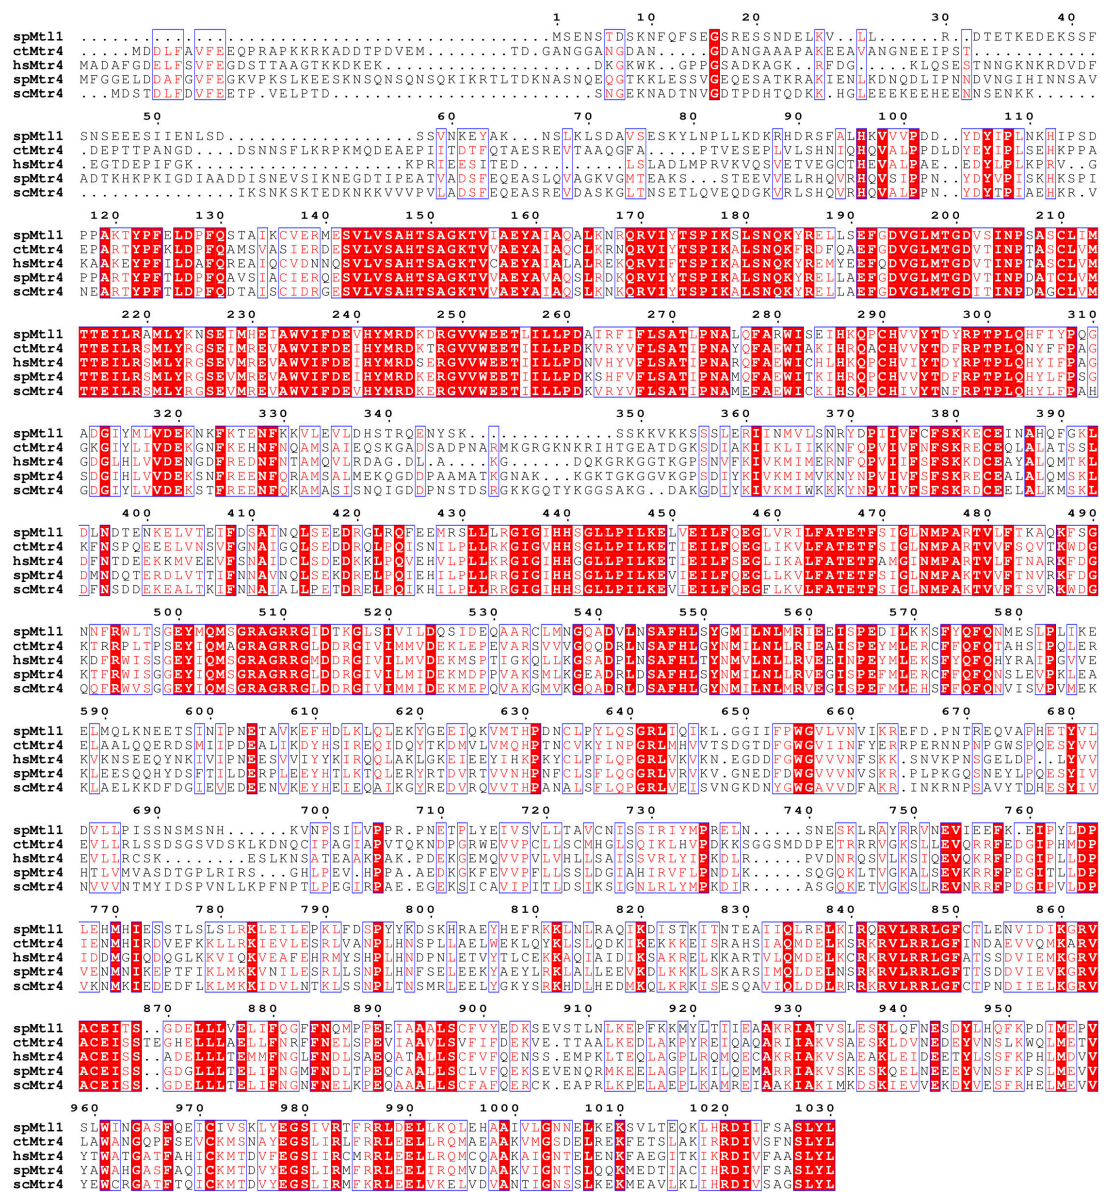

### Supplementary Figure 5 Sequence alignment of Mtr4/Mtl1

Multiple sequence alignment of *Chaetomium thermophilum* Mtr4 (ctMtr4, Uniprot ID: G0RZ64), with corresponding region of *Schizosaccharomyces pombe* Mtl1 (spMtl1, Uniprot ID: O13799), *Homo sapiens* Mtr4 (hsMtr4, Uniprot ID: P42285), *Schizosaccharomyces pombe* Mtr4 (spMtr4, Uniprot ID: O14232) and *Saccharomyces cerevisiae* Mtr4 (scMtr4, Uniprot ID: P47047). Fully conserved residues are highlighted in red.



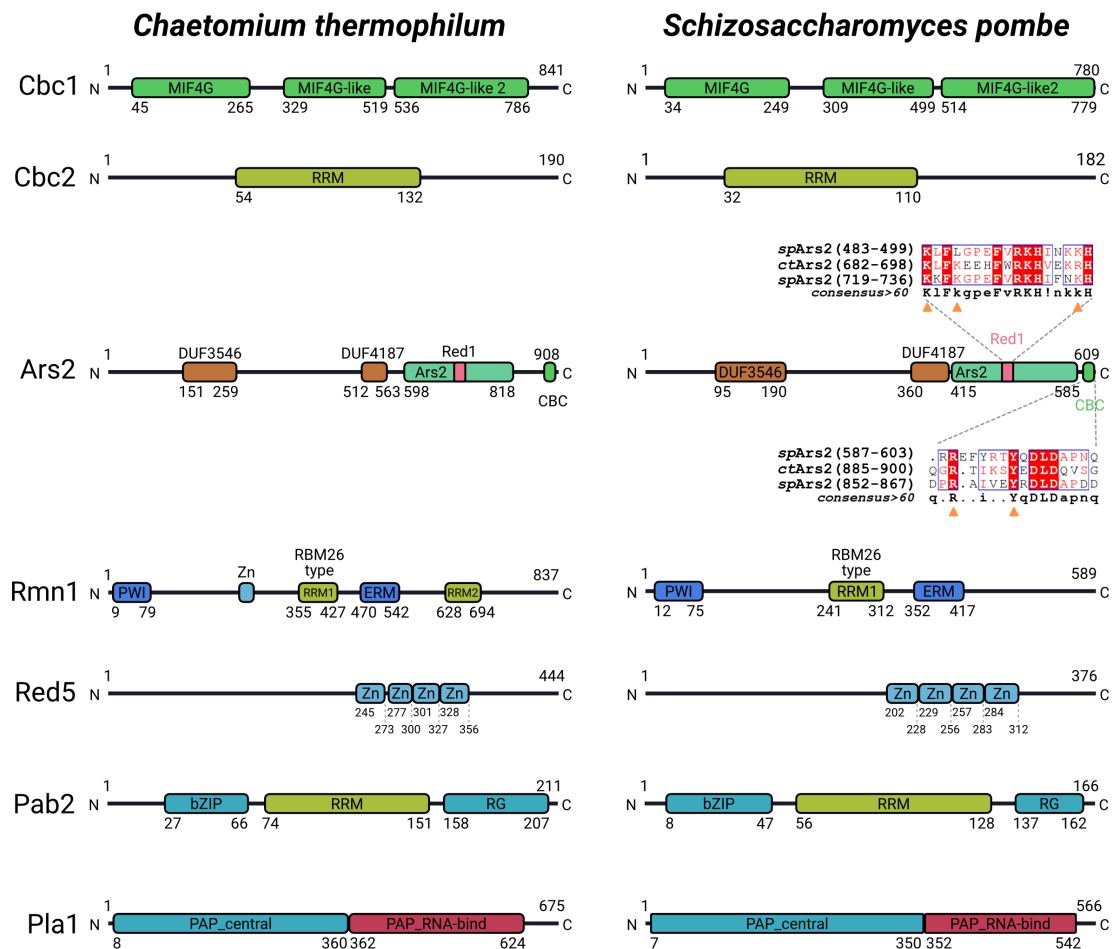

### Supplementary Figure 7 Domain organization of MTREC components in of *Chaetomium thermophilum* and *Schizosaccharomyces pombe*

The domain organization of MTREC proteins of *Chaetomium thermophilum* and *Schizosaccharomyces pombe* is shown. *ctCbc1* (Uniprot ID: G0SE05) and *spCbc1* (Uniprot ID: O14253); *ctCbc2* (Uniprot ID: G0S4F4) and *spCbc2* (Uniprot ID: Q9P383); *ctArs2* (Uniprot ID: G0SBQ9) and *spArs2* (Uniprot ID: O94326) – partial alignments of the Red1 and CBC interaction regions are shown. Orange arrowheads indicate residues previously shown to be critical for binding FLASH (PMID: 29703953) and CBC (PMID: 29101316), respectively. *HsArs2* (Uniprot ID: Q9BXP5-4) was used for the alignment; *ctRmn1* (Uniprot ID: G0S5V0) and *spRmn1* (Uniprot ID: Q9USP9); *ctRed5* (Uniprot ID: G0RZM1) and *spRed5* (Uniprot ID: O74823); *ctPab2* (Uniprot ID: G0S9J4) and *spPab2* (Uniprot ID: O14327); *ctPla1* (Uniprot ID: G0S6X0) and *spPla1* (Uniprot ID: Q10295).

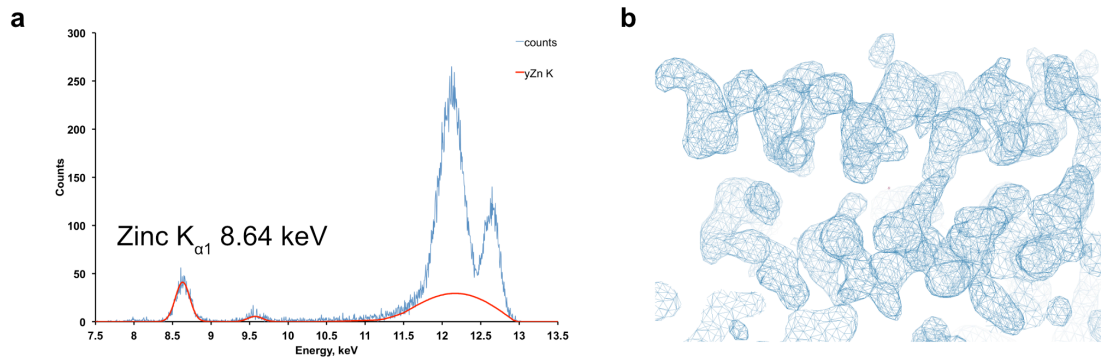

**Supplementary Figure 8 X-ray structure determination using Zn-SAD**

**a** X-ray fluorescence (XRF) spectrum revealing the presence of  $\text{Zn}^{2+}$  in the *ctMtr4-ctRed1* crystal. **b** Initial composite ( $2\text{Fo} - \text{Fc}$ , contoured at  $1.5\sigma$ ) electron density map. The figure was made in *Coot*<sup>3</sup>.

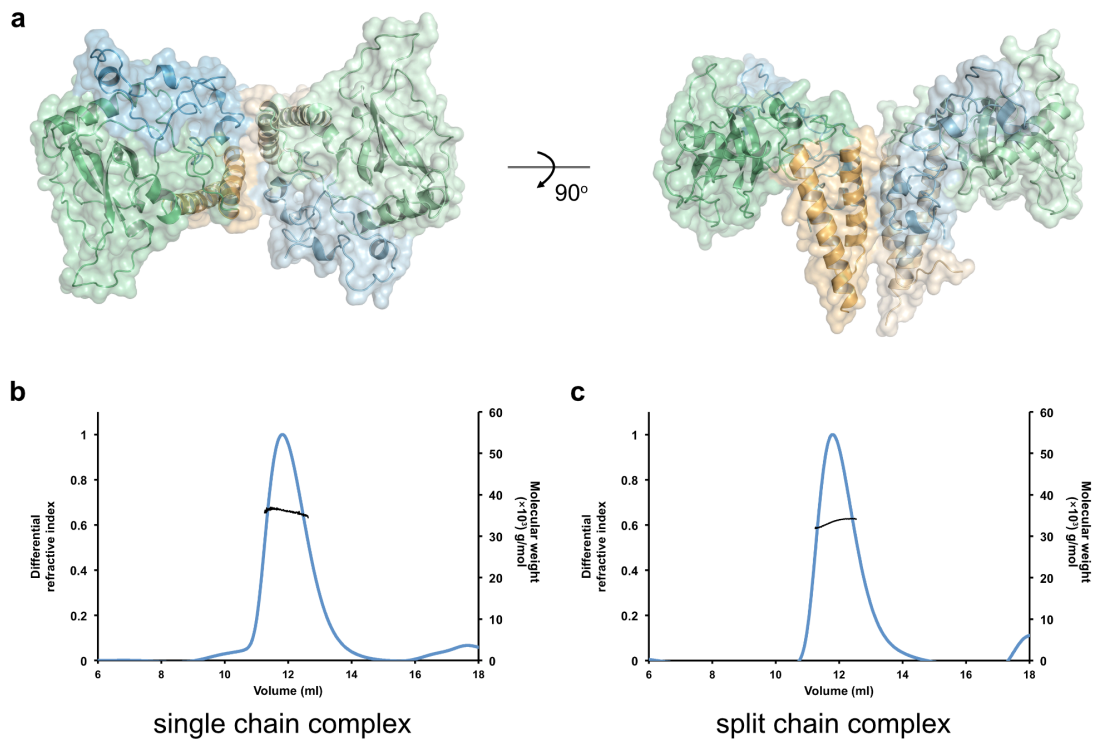

### Supplementary Figure 9 Analysis of the *ctMtr4*<sub>SA</sub>-*ctRed1*<sub>pep</sub> complex

**a** The single-chain *ctMtr4*<sub>SA</sub>-*ctRed1*<sub>pep</sub> complex crystallizes with a crystallographic dimer in the ASU. The dimer is shown in cartoon and surface representation. The color scheme is as follows: *ctRed1*<sub>pep</sub> (blue), *ctMtr4* KOW domain (green) and stalk helices (orange). **b**, **c** SEC-MALS analysis of the oligomerization state for the single-chain complex (in **b**) and the split-chain complex (in **c**). Both complexes show a molecular weight of ~34 kDa indicating a monomer in solution.

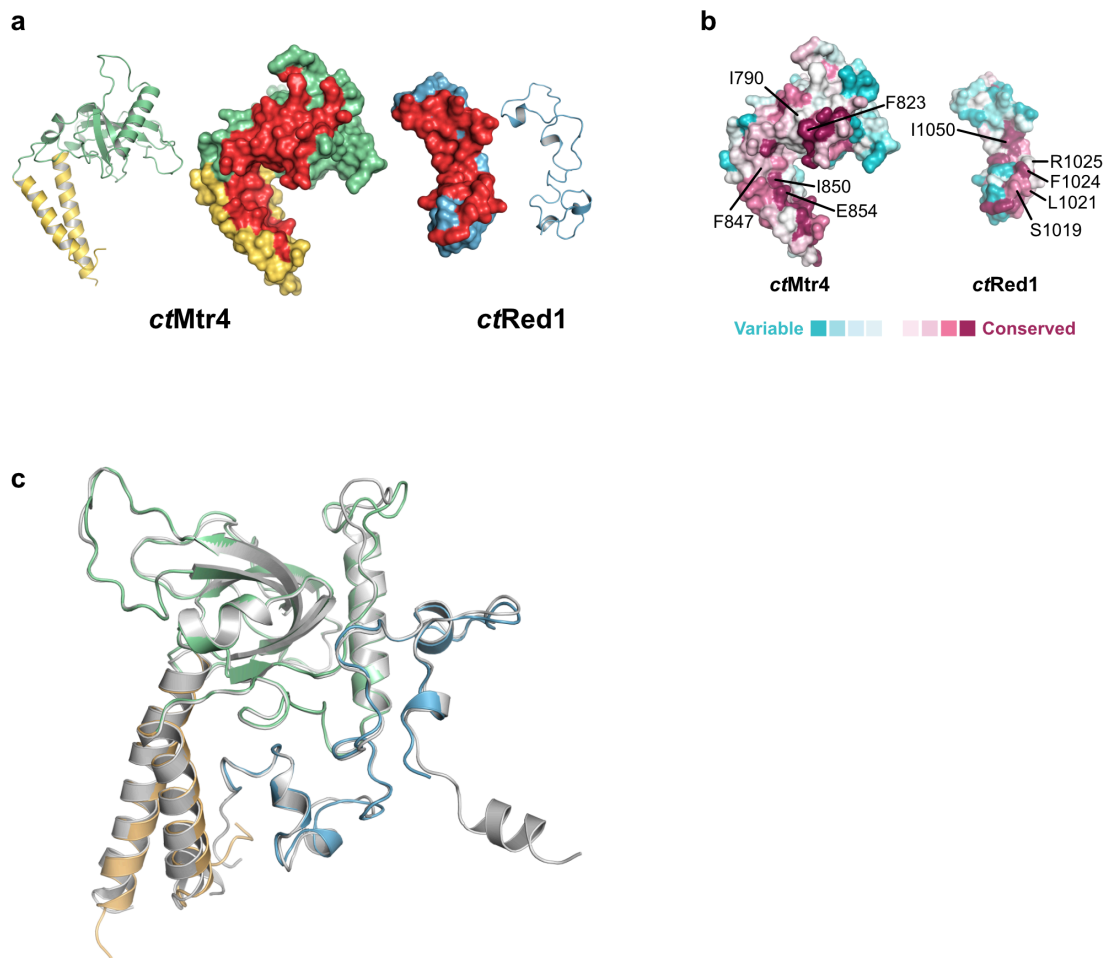

### Supplementary Figure 10 Conservation analysis of the *ctMtr4*<sub>SA</sub>-*ctRed1*<sub>pep</sub> interface

**a** Interaction between *ctMtr4*<sub>SA</sub> and *ctRed1*<sub>pep</sub> involves a large surface area of 1319.8 Å<sup>2</sup> (*ctMtr4*<sub>SA</sub>) and 1403.2 Å<sup>2</sup> (*ctRed1*<sub>pep</sub>). Both proteins are shown side by side in cartoon and surface representation. Residues involved in the interaction are highlighted (red) in the surface representation. **b** The interacting surfaces of both proteins are shown colored by conservation (analyzed with ConSurf webserver<sup>4</sup>). The majority of residues in the interface are conserved. Variable amino acids are shown in mint-green and conserved amino acids in red. **c** Superposition of single chain (in color) and split chain complex (gray) shows only small differences.

| <b>ctMtr4</b> | <b>HSDC</b> | <b>ASA</b> | <b>BSA</b> | <b>ΔiG</b> | <b>ctRed1</b> | <b>HSDC</b> | <b>ASA</b> | <b>BSA</b> | <b>ΔiG</b> |
|---------------|-------------|------------|------------|------------|---------------|-------------|------------|------------|------------|
| A:TYR 661     |             | 35.95      | 1.60       | -0.02      | B:TYR1017     | H           | 243.57     | 128.06     | 1.23       |
| A:ARG 665     |             | 76.40      | 20.18      | -0.09      | B:SER1019     | H           | 34.19      | 16.56      | 0.06       |
| A:ILE 668     |             | 10.97      | 8.46       | 0.14       | B:PRO1020     |             | 98.90      | 64.14      | 0.96       |
| A:THR 672     |             | 50.50      | 19.93      | 0.12       | B:LEU1021     |             | 107.77     | 93.35      | 1.49       |
| A:MET 675     |             | 36.23      | 31.55      | 0.76       | B:PHE1023     |             | 124.21     | 77.76      | 0.88       |
| A:MET 679     |             | 37.15      | 11.25      | 0.28       | B:PHE1024     |             | 127.67     | 109.62     | 1.75       |
| A:TYR 688     |             | 26.61      | 0.31       | 0.01       | B:ARG1025     | HS          | 111.45     | 71.49      | 0.41       |
| A:ASN 690     |             | 38.97      | 1.85       | -0.01      | B:ASN1026     |             | 119.99     | 36.19      | -0.04      |
| A:PRO 691     |             | 77.01      | 2.83       | -0.03      | B:ARG1028     |             | 37.69      | 4.45       | -0.05      |
| A:ARG 693     | HS          | 26.79      | 17.59      | -0.59      | B:VAL1037     |             | 21.87      | 10.54      | 0.17       |
| A:GLN 789     |             | 87.83      | 77.05      | -0.48      | B:ALA1038     | H           | 110.60     | 30.18      | 0.40       |
| A:ILE 790     |             | 42.51      | 42.34      | 0.68       | B:GLY1039     | H           | 26.74      | 12.62      | 0.06       |
| A:LYS 791     | H           | 110.36     | 85.46      | -0.00      | B:SER1043     | H           | 13.72      | 9.53       | -0.09      |
| A:LEU 792     |             | 31.54      | 27.68      | 0.34       | B:LEU1044     |             | 69.57      | 31.49      | 0.45       |
| A:HIS 793     | HS          | 138.42     | 81.65      | -0.43      | B:THR1045     | H           | 82.45      | 78.34      | -0.06      |
| A:VAL 794     |             | 18.08      | 2.15       | -0.00      | B:TYR1046     |             | 17.97      | 1.38       | 0.02       |
| A:ASP 796     |             | 62.42      | 3.31       | -0.06      | B:SER1047     |             | 13.46      | 10.42      | -0.12      |
| A:ARG 811     |             | 147.59     | 30.09      | 0.16       | B:SER1048     |             | 79.03      | 0.49       | 0.01       |
| A:SER 815     |             | 47.05      | 29.58      | 0.43       | B:ILE1050     |             | 80.74      | 69.28      | 0.97       |
| A:GLU 818     |             | 72.70      | 31.85      | 0.44       | B:ASP1051     |             | 55.61      | 0.98       | -0.01      |
| A:VAL 819     |             | 25.99      | 25.99      | 0.40       | B:PRO1052     | H           | 124.34     | 80.41      | 0.53       |
| A:ARG 822     |             | 178.68     | 90.52      | -0.92      | B:ASP1053     | HS          | 130.89     | 29.22      | -0.09      |
| A:PHE 823     |             | 69.93      | 64.84      | 1.04       | B:LYS1054     |             | 85.44      | 7.85       | -0.04      |
| A:GLU 824     |             | 162.09     | 24.83      | -0.23      | B:GLU1055     | HS          | 122.99     | 76.89      | 0.35       |
| A:ASP 825     | H           | 138.18     | 106.54     | -0.38      | B:MET1056     | H           | 52.72      | 52.07      | 0.65       |
| A:GLY 826     | H           | 40.60      | 19.03      | 0.08       | B:PRO1058     |             | 58.79      | 26.89      | 0.42       |
| A:ILE 827     |             | 13.29      | 5.39       | -0.06      | B:GLU1060     |             | 71.90      | 19.67      | -0.03      |
| A:PRO 828     |             | 34.31      | 33.97      | 0.54       | B:LEU1061     |             | 119.07     | 107.68     | 1.15       |
| A:HIS 829     |             | 95.46      | 72.06      | 0.71       | B:GLU1062     |             | 122.71     | 38.38      | -0.25      |
| A:MET 830     |             | 15.31      | 11.82      | 0.24       | B:PHE1072     |             | 64.69      | 14.84      | 0.24       |
| A:ASP 831     | H           | 57.75      | 49.58      | -0.27      | B:GLN1073     |             | 6.06       | 1.02       | -0.01      |
| A:PRO 832     |             | 19.27      | 18.60      | 0.30       | B:PHE1075     |             | 81.25      | 72.99      | 1.17       |
| A:ILE 833     |             | 49.56      | 4.69       | 0.08       | B:ILE1078     |             | 8.87       | 8.87       | 0.14       |
| A:GLU 834     | HS          | 134.89     | 53.46      | -0.56      |               |             |            |            |            |
| A:ASN 835     |             | 48.37      | 12.50      | -0.13      |               |             |            |            |            |
| A:LEU 847     |             | 45.06      | 25.50      | 0.38       |               |             |            |            |            |
| A:ILE 850     |             | 20.04      | 20.04      | 0.32       |               |             |            |            |            |
| A:GLU 851     |             | 92.65      | 39.18      | -0.29      |               |             |            |            |            |
| A:GLU 854     | H           | 81.65      | 59.42      | -0.51      |               |             |            |            |            |
| A:LEU 857     |             | 14.39      | 14.39      | 0.23       |               |             |            |            |            |
| A:VAL 858     |             | 90.36      | 5.52       | 0.09       |               |             |            |            |            |
| A:HIS 863     |             | 73.35      | 26.48      | 0.17       |               |             |            |            |            |
| A:ASN 864     |             | 172.25     | 2.34       | 0.04       |               |             |            |            |            |

### Supplementary Figure 11 PISA analysis of ctMtr4<sub>SA</sub>-ctRed1<sub>pep</sub> interface

Analysis of the ctMtr4-ctRed1 interaction observed in the crystal structure with the PISA webserver<sup>5</sup> (**HSDC** (Residues making Hydrogen/Disulphide bond, Salt bridge or Covalent); **ASA** Accessible Surface Area, Å<sup>2</sup>; **BSA** Buried Surface Area, Å<sup>2</sup>. The bars represented the buried area percentage, one bar per 10% ; **ΔiG** Solvation energy effect, kcal/mol.

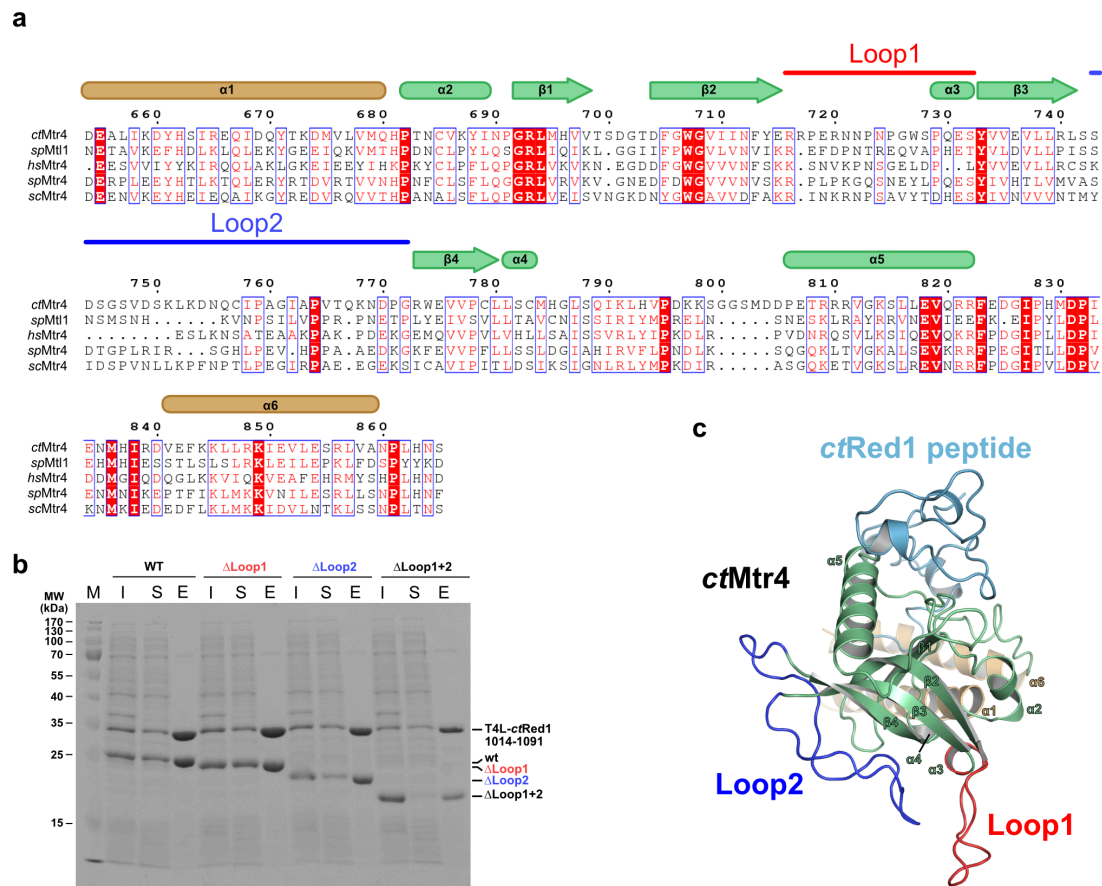

## Supplementary Figure 12 Deletion of *cfMtr4* KOW domain loops 1 and 2 does not perturb *cfRed1* binding

**a** Multiple sequence alignment of *Chaetomium thermophilum* Mtr4<sub>SA</sub> (*cfMtr4*, Uniprot ID: G0RZ64) with corresponding region of *Schizosaccharomyces pombe* Mtl1 (*spMtl1*, Uniprot ID: O13799), *Homo sapiens* Mtr4 (*hsMtr4*, Uniprot ID: P42285), *Schizosaccharomyces pombe* Mtr4 (*spMtr4*, Uniprot ID: O14232) and *Saccharomyces cerevisiae* Mtr4 (*scMtr4*, Uniprot ID: P47047). Fully conserved residues are highlighted in red. The secondary structure is given above the alignment, with stalk helices shown in orange and the KOW domain in green. The KOW domain loops 1 and 2 are highlighted in red and blue. **b** Coomassie stained SDS-PAGE of His<sub>6</sub>-tagged T4L-*cfRed1*<sub>pep</sub> co-expressed and purified with untagged *cfMtr4*<sub>SA</sub> $\Delta$ loop1, *cfMtr4*<sub>SA</sub> $\Delta$ loop2 and *cfMtr4*<sub>SA</sub> $\Delta$ loop1+2. Removal of loop1, loop2 or both does not abolish binding to *cfRed1*<sub>pep</sub>. **c** Ribbon representation of the *cfMtr4*<sub>SA</sub>-*cfRed1*<sub>pep</sub> structure with loop1 (red) and loop2 (blue) highlighted.

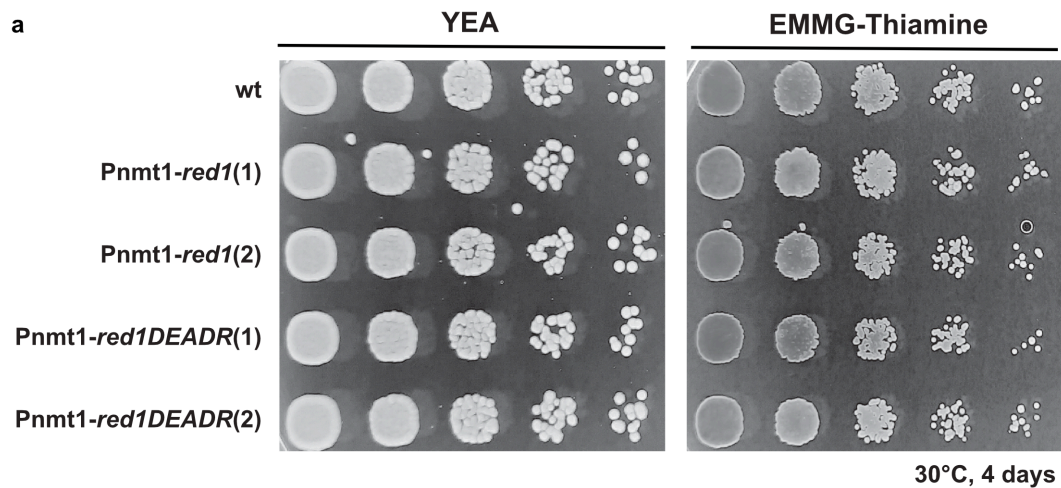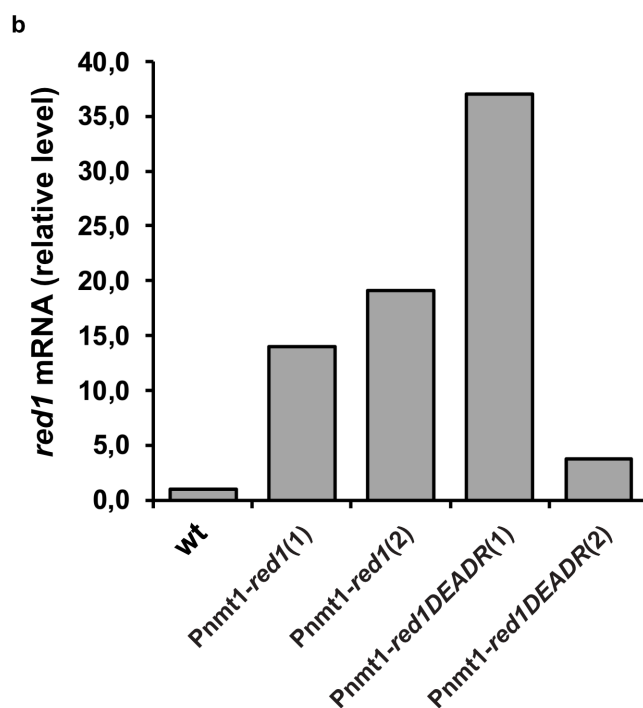

**Supplementary Figure 13 *red1* DEADR mutation is not a dominant negative allele**

Pnmt1-*red1* and Pnmt1-*red1* DEADR alleles were inserted in the Leu1 locus of wt *S. pombe* genome and (a) 5-fold serial dilution of 2 independent strains (labeled with 1 and 2) of each were spotted on YEA media (Pnmt1 promoter is repressed, non-overexpressing condition) and on EMMG-Thiamine media (Pnmt1 promoter is strongly induced, overexpressing condition). (b) qPCR analysis of the *red1* mRNA expression level for these strains in EMMG-Thiamine media, compared to *red1* expression in wt *S. pombe* cells. Two biological replicates were performed (labeled with 1 and 2), n = 2. Source data are provided as a Source Data file.

a

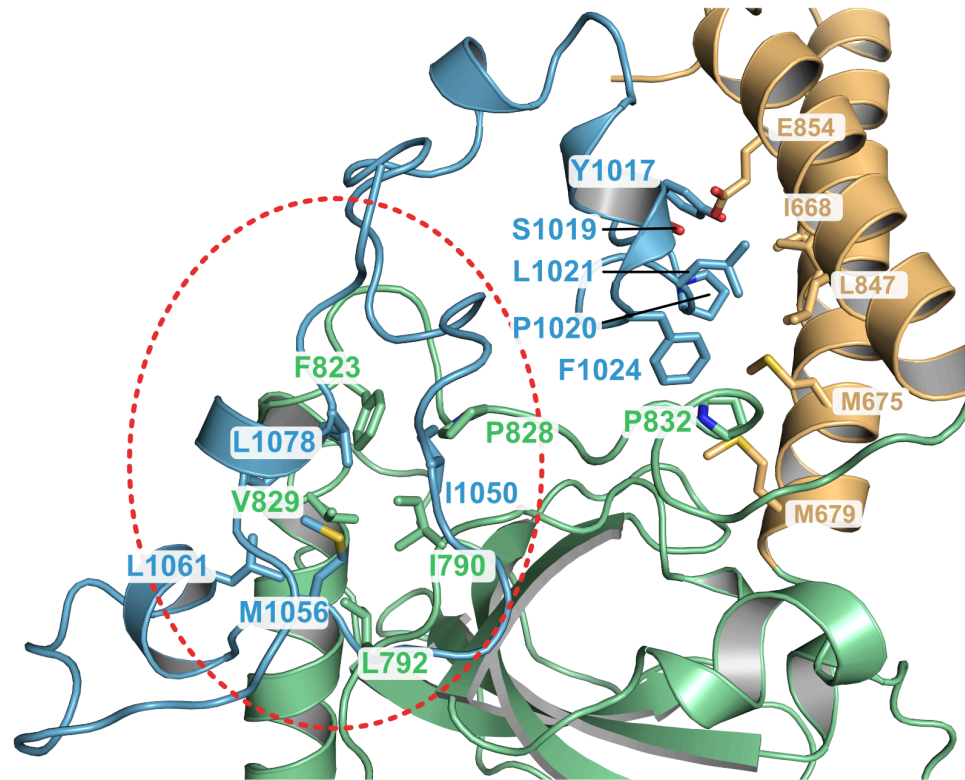

b

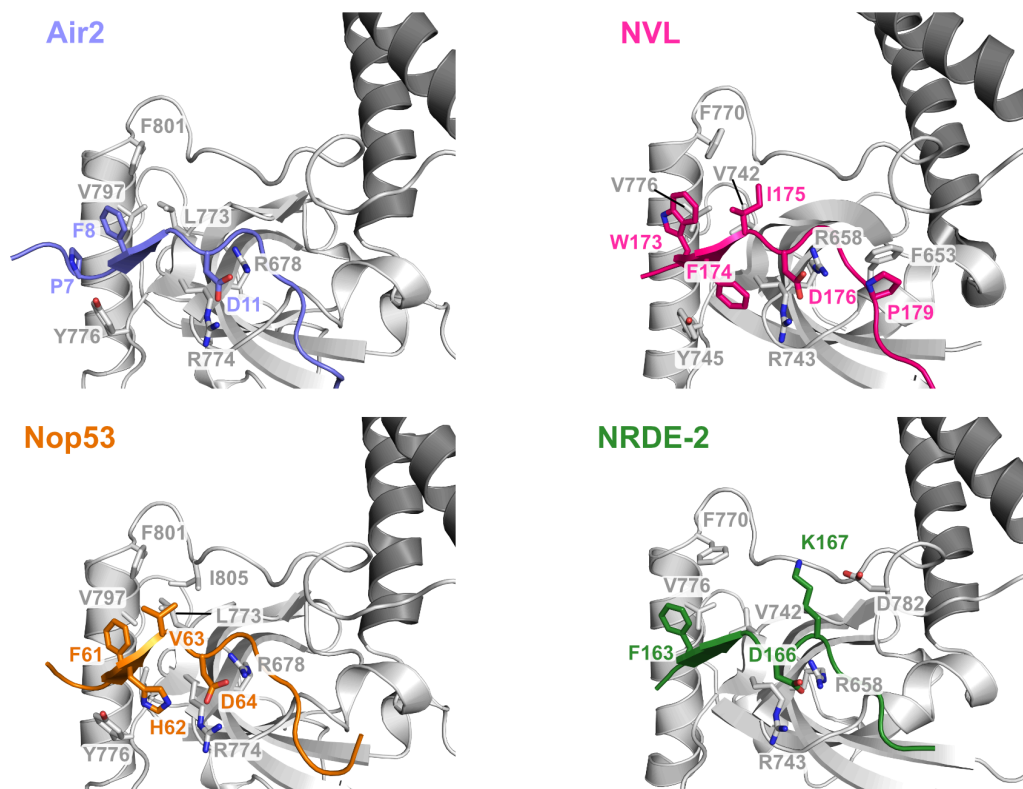

**Supplementary Figure 14 Detailed comparison of the *ctMtr4-ctRed1* crystal structure with known Mtr4 complexes**

a Crystal structure of the *ctMtr4<sub>SA</sub>-ctRed1<sub>pep</sub>* complex (colors are as in Fig. 4). Residues involved in the interaction between *ctMtr4-ctRed1* are shown in sticks

and the binding interface of the AIM or AIM-like adaptor proteins is highlighted by a red dotted line. **b** The structures of Mtr4-Air2 (PDB: 4U4C<sup>6</sup> top left), Mtr4-NVL (PDB: 6RO1<sup>7</sup> top right), Mtr4-Nop53 (PDB: 5OOQ<sup>8</sup> bottom left) and hMTR4-NRDE-2 (PDB: 6IEH<sup>9</sup> bottom right), are shown (same view as in **a**). The stalk helices are shown in dark grey, the KOW domain is in light grey and the interacting peptides are shown in purple (Air2), magenta (NVL), orange (Nop53) and green (NRDE-2). The residues involved in the interaction are shown as sticks.

```

      980      990      1000      1010      1020      1030
G0S1V1 QISVAAQPREEAQELEVDTAGEVKVVSRRGGVDTDQLTDHQVSDERGSKQDNTALSYS SPL
cDNA   QISVAAQPREEAQELEVDTAGE.....VSDERGSKQDNTALSYS SPL

      1040      1050      1060      1070      1080      1090
G0S1V1 RFFRNFRFHPEFTRLVAGGWRSLTYSSRIDPKEMCPYELEGTQCPSGCSFQHFVDITPA
cDNA   RFFRNFRFHPEFTRLVAGGWRSLTYSSRIDPKEMCPYELEGTQCPSGCSFQHFVDITPA

      1100      1110      1120      1130      1140      1150
G0S1V1 .DERILLELSNSDMFDGEDKVRFVEGLRALLHRFKADKIRDFETIARGIIEYRFQHIGDR
cDNA   ADERILLELSNSDMFDGEDKVRFVEGLRALLHRFKADKIRDFETIARGIIEYRFQHIGDR

      1160
G0S1V1 SKLLPLDGVSI
cDNA   SKLLPLDGVSI

```

**Supplementary Figure 15 Sequence alignment of the conserved Red1 C-terminal region**

The *ctRed1* C-terminal region from the Uniprot ID G0S1V1 sequence is compared with the sequence amplified from cDNA. Differences are highlighted by red boxes, which leads to differences in residue numbers. The sequence of our crystallization construct is indicated in blue. Differences between "observed" protein sequences and those annotated in the *Chaetomium thermophilum* genome database have been noticed in the past years and await correction. The *ctRed1* sequence adds to this list.

**Supplementary Table 1. Yeast strain used in this study**

| <b>Nr.</b>             | <b>Name</b>               | <b>Relevant Genotype</b>                                                                                           | <b>Reference</b>                       |
|------------------------|---------------------------|--------------------------------------------------------------------------------------------------------------------|----------------------------------------|
| <b><i>S. pombe</i></b> |                           |                                                                                                                    |                                        |
| P344                   | WT                        | <i>h+</i> , <i>leu1-32</i> , <i>ura4D18</i> ,<br><i>ade6-M210</i>                                                  | V2-33-H12, Bioneer Inc                 |
| P918                   | WT                        | <i>h90</i> , <i>leu1-32</i> ,<br><i>ura4D18</i> , <i>ade6-M210</i>                                                 | Sugiyama et al<br>(2011) <sup>10</sup> |
| P934                   | <i>red1</i> Δ             | <i>h90</i> , <i>leu1-32</i> ,<br><i>ura4D18</i> , <i>ade6-M210</i> ,<br><i>red1</i> Δ:: <i>kanMX6</i>              | Sugiyama et al<br>(2011) <sup>10</sup> |
| F3091                  | Mtl1(L784R/E788R)<br>(E1) | <i>h90</i> , <i>leu1-32</i> ,<br><i>ura4D18</i> , <i>ade6-M210</i> ,<br><i>mtl1-</i><br><i>L784R/E788R::natNT2</i> | this study                             |
| F3092                  | Mtl1(WT) (E2)             | <i>h90</i> , <i>leu1-32</i> ,<br><i>ura4D18</i> , <i>ade6-M210</i>                                                 | this study                             |
| F3093                  | Mtl1(L784R/E788R)<br>(E3) | <i>h90</i> , <i>leu1-32</i> ,<br><i>ura4D18</i> , <i>ade6-M210</i> ,<br><i>mtl1-</i><br><i>L784R/E788R::natNT2</i> | this study                             |
| F3094                  | Mtl1(L784R/E788R)<br>(B1) | <i>h90</i> , <i>leu1-32</i> ,<br><i>ura4D18</i> , <i>ade6-M210</i> ,<br><i>mtl1-</i><br><i>L784R/E788R::natNT2</i> | this study                             |
| F3095                  | Mtl1(WT) (B2)             | <i>h90</i> , <i>leu1-32</i> ,<br><i>ura4D18</i> , <i>ade6-M210</i>                                                 | this study                             |
| F3096                  | Mtl1(L784R/E788R)<br>(B3) | <i>h90</i> , <i>leu1-32</i> ,<br><i>ura4D18</i> , <i>ade6-M210</i> ,<br><i>mtl1-</i><br><i>L784R/E788R::natNT2</i> | this study                             |
| NP70                   | Red1(DEADR) (A1)          | <i>h90</i> , <i>leu1-32</i> ,<br><i>ura4D18</i> , <i>ade6-M210</i> ,<br><i>red1-DEADR::hphNT1</i>                  | this study                             |
| NP71                   | Red1(DEADR) (A4)          | <i>h90</i> , <i>leu1-32</i> ,<br><i>ura4D18</i> , <i>ade6-M210</i> ,<br><i>red1-DEADR::hphNT1</i>                  | this study                             |
| NP72                   | Red1(DEADR) (B2)          | <i>h90</i> , <i>leu1-32</i> ,<br><i>ura4D18</i> , <i>ade6-M210</i> ,<br><i>red1-DEADR::hphNT1</i>                  | this study                             |
| NP73                   | Red1(WT) (B3)             | <i>h90</i> , <i>leu1-32</i> ,<br><i>ura4D18</i> , <i>ade6-M210</i>                                                 | this study                             |
| NP74                   | Red1(DEADR) (B4)          | <i>h90</i> , <i>leu1-32</i> ,<br><i>ura4D18</i> , <i>ade6-M210</i> ,<br><i>red1-DEADR::hphNT1</i>                  | this study                             |

|                      |                     |                                                                                                                                      |                                  |
|----------------------|---------------------|--------------------------------------------------------------------------------------------------------------------------------------|----------------------------------|
| NP75                 | Red1(DEADR) (D1)    | <i>h90, leu1-32, ura4D18, ade6-M210, red1-DEADR::hphNT1</i>                                                                          | this study                       |
| NP76                 | Red1(DEADR) (D2)    | <i>h90, leu1-32, ura4D18, ade6-M210, red1-DEADR::hphNT1</i>                                                                          | this study                       |
| NP77                 | Red1(WT) (B3)       | <i>h90, leu1-32, ura4D18, ade6-M210</i>                                                                                              | this study                       |
| NP78                 | red1 $\Delta$ (B4)  | <i>h90, leu1-32, ura4D18, ade6-M210, red1<math>\Delta</math>::kanMX6</i>                                                             | this study                       |
| NP79                 | red1 $\Delta$ (E4)  | <i>h90, leu1-32, ura4D18, ade6-M210, red1<math>\Delta</math>::kanMX6</i>                                                             | this study                       |
| F3321                | Pnmt1-Red1 (1)      | <i>h+, HIS, leu1-32, ade6-210, ura4-D18, 5'Leu1-pnmt1-red1-3'Leu1::kanMX6</i>                                                        | this study                       |
| F3320                | Pnmt1-Red1 (2)      | <i>h+, HIS, leu1-32, ade6-210, ura4-D18, 5'Leu1-pnmt1-red1-3'Leu1::kanMX6</i>                                                        | this study                       |
| F3322                | Pnmt1-Red1DEADR (1) | <i>h+, HIS, leu1-32, ade6-210, ura4-D18, 5'Leu1-pnmt1-red1-DEADR-3'Leu1::kanMX6</i>                                                  | this study                       |
| F3323                | Pnmt1-Red1DEADR (2) | <i>h+, HIS, leu1-32, ade6-210, ura4-D18, 5'Leu1-pnmt1-red1-DEADR-3'Leu1::kanMX6</i>                                                  | this study                       |
| <i>S. cerevisiae</i> |                     |                                                                                                                                      |                                  |
| S145                 | PJ69-4A             | MAT $\alpha$ , trp1-901, leu2-3,112, ura3-52, his3-200, gal4 $\Delta$ , gal80 $\Delta$ , LYS2::GAL1-HIS3, GAL2-ADE2, met2::GAL7-lacZ | James et al., 1996 <sup>11</sup> |

---

**Supplementary Table 2. Primers used in this study**

| <b>Nr.</b>  | <b>Name</b>                       | <b>Sequence (5'-&gt;3')</b>                                      |
|-------------|-----------------------------------|------------------------------------------------------------------|
| <b>N1</b>   | <i>spCbc1_FW_NcoI</i>             | CACCATCACCATCACCCCATGG<br>CTTCTTATCGGGGATCAA                     |
| <b>N2</b>   | <i>spCbc1_RE_EcoRI</i>            | CGACGGAGCTCGAATTCTTATTT<br>TTCCTCATTAGTTGCATCAG                  |
| <b>N3</b>   | <i>spCbc2_FW_NcoI</i>             | CACCATCACCATCACCCCATGG<br>CATCAATAACAAGGTTAG                     |
| <b>N4</b>   | <i>spCbc2_RE_EcoRI</i>            | CGACGGAGCTCGAATTCTTAAT<br>TTTTTTTCCAACGATTGTATC                  |
| <b>N13</b>  | <i>ctMtr4_FW_NcoI</i>             | GCTACCATGGATGACCTCTTTG<br>CCGTC                                  |
| <b>N14</b>  | <i>ctMtr4_RE_BamHI</i>            | GCTAGGATCCTTACAGATACAA<br>GCTGTTGAACGAG                          |
| <b>N59</b>  | <i>spArs2_215aa_RE</i>            | AATTGGTACCTTAGGATCCGTCT<br>TGGTTCCATTTGGAAAGTTG                  |
| <b>N60</b>  | <i>spArs2_540aa_RE</i>            | AATTGGTACCTTAGGATCCTAAA<br>ATCTGTAAGGATACATACGACG<br>TG          |
| <b>N209</b> | <i>spRed1_345aa_NcoI_FW</i>       | TATACCATGGGTCTTACTATGTC<br>TCGTTCCAGAT                           |
| <b>N210</b> | <i>spMtl1-dKOW-FW-Frg1-StuI</i>   | CTTTCAGAAGAAGATAGAGGCC<br>TC                                     |
| <b>N211</b> | <i>spMtl1-dKOW-RE-Frg1-GA</i>     | GAACCAGAAGCTGATCCAGAAC<br>CGGTCATTACCTTTTGAATTTCT<br>TCCC        |
| <b>N212</b> | <i>spMtl1-dKOW-FW-Frg2-GA</i>     | TTCTGGATCAGCTTCTGGTTCA<br>GGTTCCTCTACGTTAAGTTTATC<br>TCTTCGAAAAC |
| <b>N213</b> | <i>spMtl1-dKOW-RE-Frg2-SacII</i>  | GTGTTGCGCAAGAGCCGCGG                                             |
| <b>N214</b> | <i>spMtl1-dArch-RE-Frg1-GA</i>    | CTCGAAGTTGTATAATCGCCTCA<br>GATTCATATTTTGGAACTGATA<br>AAAG        |
| <b>N215</b> | <i>spMtl1-dArch-FW-Frg2-GA</i>    | GAGGCGATTATACAACTTCGAG<br>AAC                                    |
| <b>N241</b> | <i>spMtl1-dArch-seq1-FW</i>       | TTAGACAAAGGGTTTTACGGCG                                           |
| <b>N287</b> | <i>spArs2_140aa_FW-NcoI</i>       | TATACCATGGTGGACGAGTCAC<br>AAGGAAGAG                              |
| <b>N288</b> | <i>spArs2_516aa_RE-BamHI</i>      | TATACTCGAGTTAGGATCCATAT<br>CCATAGAGACATATAGCCACC                 |
| <b>N295</b> | <i>ctRed1_1014aa_NcoI_FW</i>      | TATACCATGGCCTTGTCTTACTC<br>CAGCCCTC                              |
| <b>N298</b> | <i>spRed1_577aa_NcoI_FW</i>       | TATACCATGGTTCGATTATATCTC<br>TCCATTTTACCGC                        |
| <b>N299</b> | <i>spRed1_712aa_BamHI-NotI-RE</i> | TATAGCGGCCGCTTAGGATCCA<br>ATGGAAACCTTTGCAACAGGAA<br>TTGTC        |
| <b>N320</b> | <i>ctRed1-1030aa-NcoI-FW</i>      | TATACCATGGCTCCAGAGTTCA<br>CGCGGCTCG                              |

|             |                                   |                                                     |
|-------------|-----------------------------------|-----------------------------------------------------|
| <b>N321</b> | <i>ctRed1-1040aa-NcoI-FW</i>      | TATACCATGGGTTGGAGGTCTC<br>TGA CT TACAG              |
| <b>N322</b> | <i>ctRed1-1091aa-XhoI-RE</i>      | TATACTCGAGTTAGGACAGTTC<br>CAGGAGGATCCTTTC           |
| <b>N326</b> | <i>spMtl1-KOW-NcoI-FW</i>         | TATACCATGGGTCATCCTGATAA<br>TTGTTTGCCTTATCTG         |
| <b>N328</b> | <i>spMtl1-Short-Arch-NcoI-FW</i>  | TATACCATGGGTATTCCCAATGA<br>GACAGCTGTCAAG            |
| <b>N329</b> | <i>spMtl1-Short-Arch-BamHI-RE</i> | TATAGGATCCTTAAGAATCCTTG<br>TAGTAAGGGCTGTC           |
| <b>N330</b> | <i>spMtl1-Arch-NcoI-FW</i>        | TATACCATGGGTTTACCTTTAAT<br>TAAAGAAGAACTTATGCAATT    |
| <b>N331</b> | <i>spMtl1-Arch-BamHI-RE</i>       | TATAGGATCCTTAAGTATTTGTA<br>ATTTTCGTCGATATATCTTTTATC |
| <b>N332</b> | <i>spRed1-187aa-NcoI-FW</i>       | TATACCATGGCAAATTATTCCAA<br>GACTACTAATCAAAAAG        |
| <b>N333</b> | <i>spRed1-187aa-BamHI-RE</i>      | TATAGGATCCTTATGCATCAGAA<br>TTTTTAGATGTTGAAAG        |
| <b>N334</b> | <i>spRed1-345aa-BamHI-RE</i>      | TATAGGATCCTTAACCATTTTCA<br>CTATTTGAGGGGGG           |
| <b>N350</b> | <i>spMtl1-KOW-BamHI-RE</i>        | TATAGGATCCTTATTCATTCGAG<br>TTCAACTCTCGTGG           |
| <b>N353</b> | <i>splss10-180aa-XhoI-RE</i>      | TATACTCGAGTTAAGCTTGATTC<br>CCATACAAAGATAAAG         |
| <b>N354</b> | <i>splss10-180aa-NcoI-FW</i>      | TATACCATGGCTTTTAATCCTTC<br>TTCAGTTCTTCCTAG          |
| <b>N355</b> | <i>splss10-379aa-XhoI-RE</i>      | TATACTCGAGTTAAGCAGAAGG<br>ACGAGGGTGAG               |
| <b>N356</b> | <i>splss10-379aa-NcoI-FW</i>      | TATACCATGGCTGTCCTTTTAGA<br>TAAACCGGTTTC             |
| <b>N357</b> | <i>spMmi1-344aa-XhoI-RE</i>       | TATACTCGAGTTAATTTTCGTCA<br>AGAACA ACTCGGG           |
| <b>N358</b> | <i>spMmi1-345aa-NcoI-FW</i>       | TATACCATGGGAATTTACACACC<br>GCTCCCG                  |
| <b>N359</b> | <i>spRmn1-326aa-XhoI-RE</i>       | TATACTCGAGTTATGCAA ACTTC<br>TTTGGTTCGATTGTG         |
| <b>N360</b> | <i>spRmn1-326aa-NcoI-FW</i>       | TATACCATGGCATCCATAAATC<br>TCCC ACTAC                |
| <b>N361</b> | <i>spArs2-296aa-XhoI-RE</i>       | TATACTCGAGTTAAGATTCAATA<br>GTAAAATTTGAATCCAATTG     |
| <b>N362</b> | <i>spArs2-297aa-NcoI-FW</i>       | TATACCATGGAAAATCCAAAAT<br>TCCTACTCACACG             |
| <b>N363</b> | <i>spArs2-449aa-XhoI-RE</i>       | TATACTCGAGTTATTTTGCTTTA<br>ATATCCACATTTTCAGG        |
| <b>N364</b> | <i>spArs2-450aa-NcoI-FW</i>       | TATACCATGGGGGCATTACCCG<br>TTGAAGAT                  |
| <b>N377</b> | <i>spRed1-236aa-BamHI-RE</i>      | TATAGGATCCTTAGGAATCCAGT<br>CCGAGCTTTAAAAA           |
| <b>N378</b> | <i>spRed1-23aa-NcoI-FW</i>        | TATACCATGGATGAGAGTAATG<br>ACTCTGACAAAAG             |

|             |                                       |                                                                       |
|-------------|---------------------------------------|-----------------------------------------------------------------------|
| <b>N379</b> | <i>spRed1-42aa-NcoI-FW</i>            | TATACCATGGTTATAGATCAATC<br>AAATTCAGTTCCG                              |
| <b>N408</b> | 5UTR- <i>spRed1-FW-GA-HindIII</i>     | CGGCCGCCAGCTGAAGCTTTAC<br>TAAATTACTGACTAGTCCATTAA<br>AAGC             |
| <b>N409</b> | 5UTR- <i>spRed1-RE-GA</i>             | TTATTTACAGCTAAAAGTGGGTT<br>AGTAGTG                                    |
| <b>N410</b> | <i>spRed1-CDS-FW-GA</i>               | AACCCAGTTTTAGCTGTAAATAA<br>ATGTCCCGGTCAATAAATCTCG<br>ATGAG            |
| <b>N411</b> | <i>spRed1-CDS-RE-GA-Ascl</i>          | GGCAAGCTAAACAGATCTGGCG<br>CGCCTTAGGATCCAATGGAAAC<br>CTTTGCAACAGGAATTG |
| <b>N412</b> | 3UTR- <i>spRed1-FW-GA-Sacl</i>        | CGCTCGAAGGCTTTAACGAGCT<br>CATTGAAACTGCCAAGCAACAT<br>CAAAC             |
| <b>N413</b> | 3UTR- <i>spRed1-RE-GA-Sacl</i>        | ATCTGATATCATCGATGAATTCG<br>AGCTGTGGTATTAATAGTTTGGC<br>CTTTCATCC       |
| <b>N414</b> | <i>spRed1-29-41aa-FW</i>              | CATGTCTGACAAAGAAGATGGC<br>GAAATTAGCGAAGACGATCCTT<br>AAG               |
| <b>N415</b> | <i>spRed1-29-41aa-RE</i>              | GATCCTTAAGGATCGTCTTCGC<br>TAATTTGCGCCATCTTCTTTGTCA<br>GA              |
| <b>N416</b> | <i>spRed1-29-41aa(D33A-E35A)-FW</i>   | CATGTCTGACAAAGAAGCTGGC<br>GCAATTAGCGAAGACGATCCTT<br>AAG               |
| <b>N417</b> | <i>spRed1-29-41aa(D33A-E35A)-RE</i>   | GATCCTTAAGGATCGTCTTCGC<br>TAATTGCGCCAGCTTCTTTGTCA<br>GA               |
| <b>N422</b> | <i>spMmi1-191aa-FW-NcoI</i>           | TATACCATGGGAAGTTCTCGTTA<br>TGTTGAAGAAGAAG                             |
| <b>N423</b> | <i>spMmi1-191aa-RE-BamHI</i>          | TATAGGATCCTTATCCAACAACC<br>ACTGGGTCCGC                                |
| <b>N424</b> | <i>spRed1-scADH1-term-GA-BamHI-FW</i> | TGTTGCAAAGGTTTTCCATTGGAT<br>CCTAATCTCGAGGCGAATTTCTT<br>ATGATTTA       |
| <b>N425</b> | <i>spRed1-scADH1-term-GA-BamHI-RE</i> | AGATCTGGCGCGCCTTAGTCGA<br>TTACAACAGGTGTTGTCC                          |
| <b>N426</b> | <i>splss10-54aa-NcoI-FW</i>           | TATACCATGGGTTCTGTAAACG<br>GAAAGTCGAAATTGC                             |
| <b>N427</b> | <i>splss10-250aa-NcoI-FW</i>          | TATACCATGGGCCCGAGGGCAA<br>CTAACGTTGC                                  |
| <b>N428</b> | <i>splss10-315aa-NcoI-FW</i>          | TATACCATGGGTAACGAAGAGC<br>CGTCTGTCATTCTG                              |
| <b>N429</b> | <i>splss10-250aa-XhoI-RE</i>          | TATACTCGAGTTACGGAGGAGA<br>AGGAGCTGACAC                                |
| <b>N430</b> | <i>splss10-315aa-XhoI-RE</i>          | TATACTCGAGTTAGTTTTTTTACG<br>GAGACAATTGAGTTTTTTTTC                     |

|             |                                          |                                                                                  |
|-------------|------------------------------------------|----------------------------------------------------------------------------------|
| <b>N431</b> | <i>spRed1-537aa-seq-FW</i>               | TCAATAACCGAGGTTTCCGC                                                             |
| <b>N432</b> | <i>spPla1-352aa-NcoI-FW</i>              | TATACCATGGACTTTTTTCATCG<br>TTATAAGCATTATC                                        |
| <b>N433</b> | <i>spPla1-352aa-XhoI-RE</i>              | TATACTCGAGTTAGTCGTGTTTT<br>TGAAACAAAGCTGAC                                       |
| <b>N452</b> | <i>spIss10-51aa-RE-XhoI</i>              | TATACTCGAGTTAATTTTTTAAA<br>GATTTATGTAATCTATCTCTTAA                               |
| <b>N453</b> | <i>spRed1-653aa-RE-BamHI</i>             | TATAGGATCCTTATGATAAATCT<br>TGTATAATTTTCATCATCCG                                  |
| <b>N464</b> | <i>ctRed1-1091aa-C-6xHis-XhoI</i>        | TATACTCGAGTTAGTGATGGTG<br>ATGGTGATGAGAACCGGACAGT<br>TCCAGGAGGATCC                |
| <b>N516</b> | <i>spRed1-216aa-BamHI-RE</i>             | TATAGGATCCTTAAATAAAATCG<br>TTAAAGCGCACTCC                                        |
| <b>N517</b> | <i>spRed1-217-236aa-Adaptor-NcoI-FW</i>  | CATGGCTGAGGGCATCGAGCCT<br>TCGGTTGTTCACTTTATTTTTTA<br>AAGCTCGGACTGGATTCCTAAG      |
| <b>N518</b> | <i>spRed1-187-216aa-Adaptor-BamHI-RE</i> | GATCCTTAGGAATCCAGTCCGA<br>GCTTTAAAAATAAAGTATGAACA<br>ACCGAAGGCTCGATGCCCTCAG<br>C |
| <b>N519</b> | <i>ctRed1-1040aa-FW-GA-BamHI</i>         | GTTCAACAGCTTGTATCTGGGC<br>GGCTCCGGTTCCGGTTGGAGGT<br>CTCTGACTTAC                  |
| <b>N520</b> | <i>ctRed1-1091aa-RE-GA-BamHI</i>         | TGGTGGTGCTCGAGTTAGGATC<br>CGGACAGTTCCAGGAGAATCCT<br>TTCAT                        |
| <b>N521</b> | <i>spMtr4-NcoI-FW-GA</i>                 | AGAGGAGGACCTGGGTTCCATG<br>GGTTTTGGTGGTGAGTTAGATG<br>ATGC                         |
| <b>N522</b> | <i>spMtr4-BamHI-RE-GA</i>                | CGCGGCCGCTCGAGTTAGGATC<br>CAAATATAGTGATGCACTAAAA<br>ACAATATC                     |
| <b>N539</b> | <i>spRed1-288aa-NcoI-FW</i>              | TATACCATGGGCATATCTTTACC<br>ACTTTTGAAGCAG                                         |
| <b>N540</b> | <i>spRed1-287aa-BamHI-RE</i>             | TATAGGATCCTTAAAGATTTTTT<br>CTTTCAGGAAGGAC                                        |
| <b>N547</b> | <i>ctMtr4-short-Arch-NcoI-FW</i>         | TATACCATGGGCTCTGGACCCG<br>ACGAGGCGCTCATCAAG                                      |
| <b>N550</b> | <i>ctMtr4-short-Arch-BamHI-noStop-RE</i> | TATAGGATCCCGAGTTGTGCAG<br>CGGGTTG                                                |
| <b>N551</b> | <i>ctMtr4-short-Arch-BamHI-RE</i>        | TATAGGATCCTTACGAGTTGTG<br>CAGCGGGTTG                                             |
| <b>N556</b> | <i>ctRed1-1091-GA-RE</i>                 | AGTCAGTGGTGGTGGTGGTGGT<br>GGGATCCGGACAGTTCCAGGA<br>GAATCCTTTTCATC                |
| <b>N557</b> | <i>ctRed1-1091-STOP-GA-RE</i>            | AGTCAGTGGTGGTGGTGGTGGT<br>GGTTAGGATCCGGACAGTTCCA<br>GGAGAATCCTTTTCATC            |

|             |                                      |                                                                 |
|-------------|--------------------------------------|-----------------------------------------------------------------|
| <b>N558</b> | <i>ctRed1-1014-GGSGGS-GA-FW</i>      | CCCGCTGCACAACCTCGGGTGGT<br>TCTGGCGGTTCCGCCTTGTCTT<br>ACTCCAGCCC |
| <b>N577</b> | <i>ctMtr4-Arch-632-NcoI-FW</i>       | TATACCATGGGTAGCATCCCC<br>AGCTAGAGC                              |
| <b>N578</b> | <i>ctMtr4-Arch-897-BamHI-RE</i>      | TATATTAGGATCCGGAGTGCGC<br>ACGCGAGATC                            |
| <b>N579</b> | <i>ctMtr4-KOW-dLoop1-FW-QC</i>       | GAGGGTAGCGGTTCTTACGTCTG<br>TCGAGGTACTIONCTCC                    |
| <b>N580</b> | <i>ctMtr4-KOW-dLoop1-RE-QC</i>       | ACGTAAGAACCGCTACCCTCGT<br>AGAAGTTGATGATGACGCC                   |
| <b>N581</b> | <i>ctMtr4-KOW-dLoop2-FW-QC</i>       | GGCAGCGGTAGCGGTTCTGGC<br>CGCTGGGAGGTCGTG                        |
| <b>N582</b> | <i>ctMtr4-KOW-dLoop2-RE-QC</i>       | AGAACCGCTACCGCTGCCGGAT<br>AGGCGGAGGAGTACCTC                     |
| <b>N583</b> | <i>spRed1-29-41aa-NoSTOP-FW-Xhol</i> | CATGTCTGACAAAGAAGATGGC<br>GAAATTAGCGAAGACGATCCTC                |
| <b>N584</b> | <i>spRed1-29-41aa-NoSTOP-RE-Xhol</i> | TCGAGAGGATCGTCTTCGCTAA<br>TTTCGCCATCTTCTTTGTCAGA                |
| <b>N602</b> | <i>ctRed1-F1024R-FW-QC</i>           | CCAGCCCTCTACGCAGGTTCCG<br>GAACTTCCGATTC                         |
| <b>N603</b> | <i>ctRed1-F1024R-RE-QC</i>           | GAATCGGAAGTTCCGGAACCTG<br>CGTAGAGGGCTGG                         |
| <b>N604</b> | <i>ctRed1-I1050R-FW-QC</i>           | CAGCAGGAGAGATCCTGACAAA<br>GAGATGTGCC                            |
| <b>N605</b> | <i>ctRed1-I1050R-RE-QC</i>           | GTCAGGATCTCTCCTGCTGCTG<br>TAAGTCAGAGAC                          |
| <b>N606</b> | <i>ctRed1-S1043R-T1045R-FW-QC</i>    | TGGAGGAGACTGAGATACAGCA<br>GCAGGATTGATCCTGAC                     |
| <b>N607</b> | <i>ctRed1-S1043R-T1045R-FW-QC</i>    | CTGTATCTCAGTCTCCTCCAACC<br>ACCGGCCACG                           |
| <b>N608</b> | <i>ctRed1-E1060R-FW-QC</i>           | CCCATATAGACTGGAGGGGACA<br>CAGTGCC                               |
| <b>N609</b> | <i>ctRed1-E1060R-RE-QC</i>           | CCCCTCCAGTCTATATGGGCAC<br>ATCTCTTTGTCAGG                        |
| <b>N610</b> | <i>spRed1_F586R-FW-QC</i>            | ATTTTACCGCAGAAAATCTTATC<br>GATTTAATCAACAATTTGTTGAG              |
| <b>N611</b> | <i>spRed1_F586R-RE-QC</i>            | CGATAAGATTTTCTGCGGTAAAA<br>TGGAGAGATATAATCGAC                   |
| <b>N612</b> | <i>spRed1_S605R_T607R-FW-QC</i>      | TATCGGAGGCTTAGGTACAGCA<br>ATAAGATAGAGCCGATGAA                   |
| <b>N613</b> | <i>spRed1_S605R_T607R-RE-QC</i>      | CTGTACCTAAGCCTCCGATATTT<br>CAACGGTACTCGCTC                      |
| <b>N614</b> | <i>spRed1_I612R-FW-QC</i>            | GCAATAAGAGAGAGCCGATGAA<br>AGTTTTCTGTAAATAC                      |
| <b>N615</b> | <i>spRed1_I612R-RE-QC</i>            | CATCGGCTCTCTTATTGCTGT<br>AGGTAAGCGACCG                          |
| <b>N616</b> | <i>spRed1_E622R-FW-QC</i>            | TGTAAATACAGAACCACTGGTG<br>GTGTTTGTAATGATG                       |

|             |                                        |                                                                       |
|-------------|----------------------------------------|-----------------------------------------------------------------------|
| <b>N617</b> | <i>spRed1_E622R-RE-QC</i>              | CACCAGTGGTTCTGTATTTACAG<br>AAACTTTTCATCGGCTC                          |
| <b>N618</b> | <i>spRed1_259aa-FW-GA-BamHI</i>        | GAAGAACGGCCGAAAGCTGGT<br>GGTTCTGGCGGTTCCCGTAAGA<br>TTGACAGTAATCTTAGTG |
| <b>N619</b> | <i>spRed1_345aa-RE-GA-BamHI</i>        | GTCAGTGGTGGTGGTGGTGGT<br>GGGATCCATTTTCACTATTTGAG<br>GGGG              |
| <b>N620</b> | <i>spRed1_288aa-FW-GA-BamHI</i>        | GAAGAACGGCCGAAAGCTGGT<br>GGTTCTGGCGGTTCCATATCTTT<br>ACCACTTTTGAAGCAGG |
| <b>N621</b> | <i>spRed1_321aa-RE-GA-BamHI</i>        | GTCAGTGGTGGTGGTGGTGGT<br>GGGATCCATCATCATCGGAATC<br>AAATTCAATAAC       |
| <b>N624</b> | <i>spRed1-236aa-NoStop-BamHI-RE</i>    | TATAGGATCCGGAATCCAGTCC<br>GAGCTTTAAAAA                                |
| <b>N625</b> | <i>spRed1-345aa-NoStop-BamHI-RE</i>    | TATAGGATCCACCATTTTCACTA<br>TTTGAGGGGGG                                |
| <b>N652</b> | <i>spRed1_F586A_K587D_Frg1_RE-GA</i>   | GATAAGAATCAGCGCGGTAAAA<br>TGGAGAGATATAATCG                            |
| <b>N653</b> | <i>spRed1_F586A_K587D_Frg2_FW-GA</i>   | ATTTTACCGCGCTGATTCTTATC<br>GATTTAATCAACAATTTGTTGAG                    |
| <b>N654</b> | <i>spRed1_I641R_Frg1_RE-GA</i>         | CGTCATTTTTCTGTGCGGAAAAT<br>GCGACGCC                                   |
| <b>N655</b> | <i>spRed1_I641R_Frg2_FW-GA</i>         | ATTTTCGCGACAGAAAAATGAC<br>GGATGATGAAATTATACAAG                        |
| <b>N656</b> | <i>spRed1_S581D_F583D_Frg1_RE-GA</i>   | GCGGTATTCTGGATCGATATAAT<br>CGACAAGCGGTACC                             |
| <b>N657</b> | <i>spRed1_S581D_F583D_Frg2_FW-GA</i>   | TATATCGATCCAGAATACCGCG<br>CTGATTCTTATCGAT                             |
| <b>N658</b> | <i>spRed1_T623D_T623R_Frg1_RE-GA</i>   | CACCACCACGATCTTCGTATTTA<br>CAGAAAACTTTCATCGG                          |
| <b>N659</b> | <i>spRed1_T623D_T623R_Frg2_FW-GA</i>   | TACGAAGATCGTGGTGGTGT<br>GTAATGATGACCATTG                              |
| <b>N660</b> | <i>spRed1-576aa-BamHI-STOP-XhoI-RE</i> | ATATCTCGAGTTAGGATCCAAG<br>CGGTACCTTATCCTCAAATC                        |
| <b>N661</b> | <i>spRed1_5AA-mutant_detect_RE</i>     | ATCAGCGCGGTATTCTGGATC                                                 |
| <b>N662</b> | <i>spRed1-602aa-NcoI-FW</i>            | TATACCATGGGCAAATATCGGT<br>CGCTTACCTACAGC                              |
| <b>N663</b> | <i>spMlt1-SA-F666E-FW-QC</i>           | AAAAGAGAAGAAGATCCAAACA<br>CTCGTGAACAAGTTG                             |
| <b>N664</b> | <i>spMlt1-SA-F666E-RE-QC</i>           | AGTGTTTGGATCTTCTTCTCTTT<br>TTATGACATTGACAAGTACAC                      |
| <b>N665</b> | <i>spMlt1-SA-I652E-FW-QC</i>           | GGGGTATTGAATTTCTTGGGG<br>TGTAATTGTCAATG                               |
| <b>N666</b> | <i>spMlt1-SA-I652E-RE-QC</i>           | CCAAGGAAATTCAATACCCCT<br>AATTTTATTTGTATAAGTCG                         |
| <b>N683</b> | <i>spRed1_F586A_Frg1_RE-GA</i>         | CGATAAGATTTGGCGCGGTAAA<br>ATGGAGAGATATAATC                            |

|             |                                      |                                                          |
|-------------|--------------------------------------|----------------------------------------------------------|
| <b>N684</b> | <i>spRed1_F586A_Frg2_FW-GA</i>       | TACCGCGCCAAATCTTATCGATT<br>TAATCAACAATTTGTTG             |
| <b>N685</b> | <i>spRed1_K587D_Frg1_RE-GA</i>       | AATCGATAAGAGTCAAAGCGGT<br>AAAATGGAGAGATATAATC            |
| <b>N686</b> | <i>spRed1_K587D_Frg2_FW-GA</i>       | ACCGCTTTGACTCTTATCGATTT<br>AATCAACAATTTGTTG              |
| <b>N687</b> | <i>spRed1_F586A_mut_check_RE</i>     | GTTGATTAATCGATAAGATTTG<br>GC                             |
| <b>N688</b> | <i>spRed1_F586F_wt_check_RE</i>      | ATTGTTGATTAATCGATAAGAT<br>TTAAA                          |
| <b>N689</b> | <i>spRed1_K587D_mut_check_RE</i>     | ATTGTTGATTAATCGATAAGAG<br>TC                             |
| <b>N690</b> | <i>spRed1_K587K_wt_check_RE</i>      | CAAATTGTTGATTAATCGATAA<br>GATTT                          |
| <b>N696</b> | <i>spMtl1_I730R-frg1-GA-RE</i>       | ATAAATACGTCTAGAAGAAATGT<br>TACAAACAG                     |
| <b>N697</b> | <i>spMtl1_I730R-frg2-GA-FW</i>       | TAACATTTCTTCTAGACGATTT<br>ATATGCC                        |
| <b>N698</b> | <i>spMtl1_F758R-frg1-GA-RE</i>       | GTATTTCTTTCTTTCTTCTATAA<br>CCTCATTTAC                    |
| <b>N699</b> | <i>spMtl1_F758R-frg2-GA-FW</i>       | GTTATAGAAGAAAGAAAGGAAA<br>TACCTTATTTAG                   |
| <b>N700</b> | <i>spMtl1_L781R-frg1-GA-RE</i>       | CAAGTTTTCGTCTAGATAAACTT<br>AACGTAG                       |
| <b>N701</b> | <i>spMtl1_L781R-frg2-GA-FW</i>       | TTAAGTTTATCTAGACGAAAAC<br>TGAAATTC                       |
| <b>N702</b> | <i>spMtl1_L784R_E788R-frg1-GA-RE</i> | GGTCTAAGAATTTCTCTTTTTTCG<br>AAGAGATAAACTTAACG            |
| <b>N703</b> | <i>spMtl1_L784R_E788R-frg2-GA-FW</i> | CGAAAAAGAGAAATTCTTAGAC<br>CCAAACTCTTCGACAGCC             |
| <b>N704</b> | <i>spMtl1-dSA-frg1-GA-RE</i>         | CCAGAACCTGATCCAGAACCCT<br>CATTGGGAATATTAATTGAAGTC        |
| <b>N705</b> | <i>spMtl1-dSA-frg2-GA-FW</i>         | GTTCTGGATCAGGTTCTGGTTC<br>AGATTCTAAACATAGGGCCGAA<br>TATC |
| <b>N725</b> | <i>spMtl1_E788R-frg1-GA-RE</i>       | GAAATTCTTAGACCCAACTCTT<br>CGACAGCCC                      |
| <b>N726</b> | <i>spMtl1_E788R-frg2-GA-FW</i>       | GAGTTTGGGTCTAAGAATTTCAA<br>GTTTTCGAAGAG                  |
| <b>N/A</b>  | Red1-qPCR-FW                         | CGACCATTGGCTTTATCATCC                                    |
| <b>N/A</b>  | Red1-qPCR-RE                         | TTCAAACAACACTGACTCACAGC                                  |
| <b>N/A</b>  | GAPDH-qPCR-FW                        | AACATCATCCCCTCCTCCAC                                     |
| <b>N/A</b>  | GAPDH-qPCR-RE                        | GCCTTGATGTCCTCGTAGTTG                                    |

---

**Supplementary Table 3. Plasmids used in this study**

| <b>pND #</b>                              | <b>Plasmid</b>                                       | <b>Selection</b> | <b>References</b> |
|-------------------------------------------|------------------------------------------------------|------------------|-------------------|
| <b><i>E. coli</i> expression plasmids</b> |                                                      |                  |                   |
| 72                                        | pET_His-EYFP                                         | Kan              | Gunter Stier      |
| 76                                        | pET_His_1a-EYFP                                      | Kan              | Gunter Stier      |
| 81                                        | pET_GST_1a-EYFP                                      | Kan              | Gunter Stier      |
| 82                                        | pET_MBP_1a-EYFP                                      | Kan              | Gunter Stier      |
| 92                                        | pET_His-ctMtr4_1-1097aa                              | Kan              | this study        |
| 434                                       | pET_GST_1a-Stop-control                              | Kan              | this study        |
| 565                                       | pET_GST_1a-spRed1_29-41aa                            | Kan              | this study        |
| 566                                       | pET_GST_1a-spRed1_29-41aa-D33A,<br>E35A              | Kan              | this study        |
| 644                                       | pET21d-GST_a-ctRed1_1040-1091aa                      | Amp              | this study        |
| 646                                       | pET21d-ZZ_a-ctRed1_1040-1091aa                       | Amp              | this study        |
| 689                                       | pET21d_MBP-splss10_1-51aa                            | Amp              | this study        |
| 690                                       | pET_GST_1a-splss10_1-51aa                            | Kan              | this study        |
| 699                                       | pET_GST_1a-spRed1_1-236aa                            | Kan              | this study        |
| 733                                       | pET_MBP_1a-spRed1_187-236aa                          | Kan              | this study        |
| 828                                       | pET21d_T4L_xtal-ctRed1_1014-1091aa                   | Amp              | this study        |
| 865                                       | pET24d-ctMtr4_654-866aa                              | Kan              | this study        |
| 868                                       | pET24dC-6xHis-ctMtr4-ctRed1_654-865  <br>1014-1091aa | Kan              | this study        |
| 887                                       | pET24d-ctMtr4_654-866aa-dLoop1                       | Kan              | this study        |
| 888                                       | pET24d-ctMtr4_654-866aa-dLoop2                       | Kan              | this study        |
| 917                                       | pET24d-ctMtr4_654-866aa-dLoop1+2                     | Kan              | this study        |
| 919                                       | pET21d-Gb1_a-ctRed1_1014-1091aa                      | Amp              | this study        |
| 936                                       | pET21d_T4L_xtal-ctRed1_1014-1091aa-<br>F1024R        | Amp              | this study        |
| 937                                       | pET21d_T4L_xtal-ctRed1_1014-1091aa-<br>I1050R        | Amp              | this study        |
| 938                                       | pET21d_T4L_xtal-ctRed1_1014-1091aa-<br>S1043R,T1045R | Amp              | this study        |
| 939                                       | pET21d_T4L_xtal-ctRed1_1014-1091aa-<br>E1060R        | Amp              | this study        |
| 1003                                      | pET_His_1a-ctMtr4_short arch                         | Kan              | this study        |
| <b>Y2H/Y3H plasmids</b>                   |                                                      |                  |                   |
| 333                                       | pGBKT7                                               | Kan              | this study        |
| 334                                       | pGADT7                                               | Amp              | this study        |
| 367                                       | pGBKT7-spRed1_1-712aa                                | Kan              | this study        |
| 368                                       | pGADT7-spRed1_1-712aa                                | Amp              | this study        |
| 369                                       | pGBKT7-spMtl1_1-1030aa                               | Kan              | this study        |
| 370                                       | pGADT7-spMtl1_1-1030aa                               | Amp              | this study        |
| 371                                       | pGBKT7-spRed1_345-712aa                              | Kan              | this study        |
| 376                                       | pGBKT7-spArs2_1-609aa                                | Kan              | this study        |

|     |                                   |     |                                   |
|-----|-----------------------------------|-----|-----------------------------------|
| 377 | pGBKT7- <i>ctRed1_1014-1055aa</i> | Kan | this study                        |
| 378 | pGBKT7- <i>ctRed1_1014-1152aa</i> | Kan | this study                        |
| 379 | pGBKT7- <i>ctRed1_676-1055aa</i>  | Kan | this study                        |
| 380 | pGBKT7- <i>spRed1_577-712aa</i>   | Kan | this study                        |
| 387 | pG4ADC111_mod                     | Amp | Modified from <sup>12</sup>       |
| 388 | pG4ADHAN111_mod                   | Amp | Modified from <sup>12</sup>       |
| 389 | pG4BDN22_mod                      | Amp | Modified from <sup>12</sup>       |
| 390 | pG4BDC22_mod                      | Amp | Modified from <sup>12</sup>       |
| 396 | pGBKT7- <i>spMtl1_dArch</i>       | Kan | this study                        |
| 397 | pGBKT7- <i>spMtl1_dKOW</i>        | Kan | this study                        |
| 398 | pGADT7- <i>spRed1_345-712aa</i>   | Amp | this study                        |
| 399 | pGADT7- <i>spRed1_577-712aa</i>   | Amp | this study                        |
| 400 | pRS426                            | Amp | Tomlin et al., 2011 <sup>13</sup> |
| 411 | pGBKT7- <i>spRed5_1-376aa</i>     | Kan | this study                        |
| 412 | pGBKT7- <i>splss10_1-551aa</i>    | Kan | this study                        |
| 413 | pGBKT7- <i>spMmi1_1-488aa</i>     | Kan | this study                        |
| 414 | pGBKT7- <i>spPab2_1-166aa</i>     | Kan | this study                        |
| 415 | pGBKT7- <i>spRmn1_1-590aa</i>     | Kan | this study                        |
| 420 | pG4BDN- <i>spNrl1_1-972aa</i>     | Amp | this study                        |
| 435 | pGADT7- <i>spRed5_1-376aa</i>     | Amp | this study                        |
| 436 | pGADT7- <i>splss10_1-551aa</i>    | Amp | this study                        |
| 437 | pGADT7- <i>spMmi1_1-488aa</i>     | Amp | this study                        |
| 438 | pGADT7- <i>spPab2_1-166aa</i>     | Amp | this study                        |
| 439 | pGADT7- <i>spRmn1_1-590aa</i>     | Amp | this study                        |
| 444 | pGBKT7- <i>spArs2_140-516aa</i>   | Kan | this study                        |
| 446 | pGADT7- <i>spRed1_1-187aa</i>     | Amp | this study                        |
| 447 | pGADT7- <i>spRed1_1-345aa</i>     | Amp | this study                        |
| 448 | pGADT7- <i>spRed1_187-345aa</i>   | Amp | this study                        |
| 449 | pGADT7- <i>spRed1_187-712aa</i>   | Amp | this study                        |
| 450 | pGBKT7- <i>spMtl1_short arch</i>  | Kan | this study                        |
| 451 | pGBKT7- <i>spMtl1_Arch</i>        | Kan | this study                        |
| 452 | pGBKT7- <i>spArs2_1-516aa</i>     | Kan | this study                        |
| 453 | pGBKT7- <i>spArs2_79-609aa</i>    | Kan | this study                        |
| 454 | pGBKT7- <i>spArs2_140-609aa</i>   | Kan | this study                        |
| 469 | pGBKT7- <i>spPla1_1-566aa</i>     | Kan | this study                        |
| 473 | pRS426-ADH1                       | Amp | this study                        |
| 474 | pGBKT7- <i>splss10_1-180aa</i>    | Kan | this study                        |
| 475 | pGBKT7- <i>splss10_1-379aa</i>    | Kan | this study                        |
| 476 | pGBKT7- <i>splss10_180-379aa</i>  | Kan | this study                        |
| 477 | pGBKT7- <i>splss10_180-551aa</i>  | Kan | this study                        |
| 478 | pGBKT7- <i>splss10_379-551aa</i>  | Kan | this study                        |
| 479 | pGADT7- <i>spMmi1_1-344aa</i>     | Amp | this study                        |
| 480 | pGADT7- <i>spMmi1_345-488aa</i>   | Amp | this study                        |

|     |                                           |     |            |
|-----|-------------------------------------------|-----|------------|
| 481 | pGBKT7- <i>spRmn1_1</i> -326aa            | Kan | this study |
| 482 | pGBKT7- <i>spRmn1_326</i> -590aa          | Kan | this study |
| 483 | pGADT7- <i>spRmn1_1</i> -326aa            | Amp | this study |
| 484 | pGADT7- <i>spRmn1_326</i> -590aa          | Amp | this study |
| 485 | pGBKT7- <i>spArs2_140</i> -296aa          | Kan | this study |
| 486 | pGBKT7- <i>spArs2_140</i> -449aa          | Kan | this study |
| 487 | pGBKT7- <i>spArs2_297</i> -516aa          | Kan | this study |
| 488 | pGBKT7- <i>spArs2_450</i> -516aa          | Kan | this study |
| 490 | pGBKT7- <i>spPab2_1</i> -136aa            | Kan | this study |
| 494 | pGADT7- <i>spRed1_187</i> -236aa          | Amp | this study |
| 495 | pGADT7- <i>spRed1_24</i> -712aa           | Amp | this study |
| 496 | pGADT7- <i>spRed1_42</i> -712aa           | Amp | this study |
| 497 | pRS426-ADH1- <i>spRed1_1</i> -712aa       | Amp | this study |
| 498 | pRS426-ADH1- <i>spRed5_1</i> -376aa       | Amp | this study |
| 499 | pRS426-ADH1- <i>splss10_1</i> -551aa      | Amp | this study |
| 500 | pRS426-ADH1- <i>spMmi1_1</i> -488aa       | Amp | this study |
| 501 | pRS426-ADH1- <i>spPab2_1</i> -166aa       | Amp | this study |
| 502 | pRS426-ADH1- <i>spRmn1_1</i> -590aa       | Amp | this study |
| 507 | pG4BDN- <i>spMtl1_1</i> -1030aa           | Amp | this study |
| 508 | pG4ADHAN- <i>spMtl1_1</i> -1030aa         | Amp | this study |
| 509 | pG4ADHAN- <i>spRed1_1</i> -712aa          | Amp | this study |
| 526 | pG4ADHAN- <i>spMtl1_dKOW</i>              | Amp | this study |
| 527 | pG4ADHAN- <i>spMtl1_dArch</i>             | Amp | this study |
| 528 | pG4ADHAN- <i>spMtl1_short arch</i>        | Amp | this study |
| 529 | pG4ADHAN- <i>spMtl1_Arch</i>              | Amp | this study |
| 542 | pGADT7- <i>spRed1_29</i> -41aa            | Amp | this study |
| 543 | pGADT7- <i>spRed1_29</i> -41aa-D33A, E35A | Amp | this study |
| 548 | pGADT7- <i>spMmi1_1</i> -191aa            | Amp | this study |
| 549 | pGADT7- <i>spMmi1_191</i> -344aa          | Amp | this study |
| 550 | pG4ADHAN- <i>spMtl1_short arch-dKOW</i>   | Amp | this study |
| 551 | pG4ADHAN- <i>spMtl1_Arch-dKOW</i>         | Amp | this study |
| 556 | pGBKT7- <i>splss10_1</i> -250aa           | Kan | this study |
| 557 | pGBKT7- <i>splss10_1</i> -315aa           | Kan | this study |
| 558 | pGBKT7- <i>splss10_54</i> -379aa          | Kan | this study |
| 559 | pGBKT7- <i>splss10_250</i> -551aa         | Kan | this study |
| 560 | pGBKT7- <i>splss10_315</i> -551aa         | Kan | this study |
| 561 | pGBKT7- <i>spPla1_1</i> -352aa            | Kan | this study |
| 562 | pGBKT7- <i>spPla1_352</i> -566aa          | Kan | this study |
| 563 | pGBKT7- <i>spArs2_440</i> -516aa          | Kan | this study |
| 574 | pG4BDN- <i>spCbc1_1</i> -780aa            | Amp | this study |
| 575 | pG4ADHAN- <i>spCbc1_1</i> -780aa          | Amp | this study |
| 576 | pRS426-ADH1- <i>spCbc1_1</i> -780aa       | Amp | this study |
| 577 | pG4BDN- <i>spCbc2_1</i> -182aa            | Amp | this study |

|      |                                                     |     |            |
|------|-----------------------------------------------------|-----|------------|
| 578  | pG4ADHAN-spCbc2_1-182aa                             | Amp | this study |
| 579  | pRS426-ADH1-spCbc2_1-182aa                          | Amp | this study |
| 580  | pG4BDN-spArs2_1-609aa                               | Amp | this study |
| 581  | pG4ADHAN-spArs2_1-609aa                             | Amp | this study |
| 582  | pRS426-ADH1-spArs2_1-609aa                          | Amp | this study |
| 589  | pG4BDN-spNtr1_1-797aa                               | Amp | this study |
| 668  | pG4BDN-spMtl1_short arch                            | Amp | this study |
| 669  | pG4BDN-spMtl1_Arch                                  | Amp | this study |
| 670  | pG4ADC-spCbc2_1-182aa                               | Amp | this study |
| 672  | pG4BDC-spCbc2_1-182aa                               | Amp | this study |
| 714  | pGADT7-spRed1_50-345aa                              | Amp | this study |
| 715  | pGADT7-spRed1_100-345aa                             | Amp | this study |
| 760  | pGBKT7-splss10_1-51aa                               | Kan | this study |
| 761  | pGADT7-spRed1_187-216aa                             | Amp | this study |
| 762  | pGADT7-spRed1_217-236aa                             | Amp | this study |
| 776  | pG4ADHAN-spRed1_1-236aa                             | Amp | this study |
| 779  | pG4ADHAN-spRed1_240-712aa                           | Amp | this study |
| 1004 | pGADT7-spRed1_1-712aa-I612R                         | Amp | this study |
| 1016 | pGADT7-spRed1_1-712aa-F585A_K586D                   | Amp | this study |
| 1017 | pGADT7-spRed1_1-712aa-I641R                         | Amp | this study |
| 1018 | pGADT7-spRed1_1-712aa-F585A_K586D_I612R             | Amp | this study |
| 1019 | pGADT7-spRed1_1-712aa-I612R_I641R                   | Amp | this study |
| 1041 | pGADT7-spRed1_1-712aa-S581D_F583E_F586A_R587D_I612R | Amp | this study |
| 1042 | pGADT7-spRed1_1-712aa-F586A_R587D_I612R_T623D_T624R | Amp | this study |
| 1044 | pG4ADHAN-spRed1_1-530aa                             | Amp | this study |
| 1045 | pG4ADHAN-spRed1_1-576aa                             | Amp | this study |
| 1046 | pG4ADC-spRed1_1-576aa                               | Amp | this study |
| 1061 | pG4BDN-spMtl1_1-1030aa-I730R                        | Amp | this study |
| 1062 | pG4BDN-spMtl1_1-1030aa-F758R                        | Amp | this study |
| 1063 | pG4BDN-spMtl1_1-1030aa-L781R                        | Amp | this study |
| 1064 | pG4BDN-spMtl1_1-1030aa-L784R_E788R                  | Amp | this study |
| 1065 | pG4BDN-spMtl1_1-1030aa-dSA                          | Amp | this study |

### **S. pombe integration plasmids**

|      |                                               |     |            |
|------|-----------------------------------------------|-----|------------|
| 1039 | pFab6-Red1-gDNA_WT                            | Amp | this study |
| 1057 | pFab6-Red1-gDNA_S581D_F583E_F586A_R587D_I612R | Amp | this study |
| 1068 | pFab6-Nat2-Mtl1-L784R_E788R                   | Amp | this study |

## Supplementary References

1. Lee, N. N. *et al.* Mtr4-like protein coordinates nuclear RNA processing for heterochromatin assembly and for telomere maintenance. *Cell* **155**, 1061–1074 (2013).
2. Zhou, Y. *et al.* The fission yeast MTREC complex targets CUTs and unspliced pre-mRNAs to the nuclear exosome. *Nat. Commun.* **6**, (2015).
3. Emsley, P., Lohkamp, B., Scott, W. G. & Cowtan, K. Features and development of Coot. *Acta Crystallogr. D Biol. Crystallogr.* **66**, 486–501 (2010).
4. Ashkenazy, H., Erez, E., Martz, E., Pupko, T. & Ben-Tal, N. ConSurf 2010: calculating evolutionary conservation in sequence and structure of proteins and nucleic acids. *Nucleic Acids Res.* **38**, W529-533 (2010).
5. Krissinel, E. & Henrick, K. Inference of macromolecular assemblies from crystalline state. *J. Mol. Biol.* **372**, 774–797 (2007).
6. Falk, S. *et al.* The molecular architecture of the TRAMP complex reveals the organization and interplay of its two catalytic activities. *Mol. Cell* **55**, 856–867 (2014).
7. Lingaraju, M. *et al.* The MTR4 helicase recruits nuclear adaptors of the human RNA exosome using distinct arch-interacting motifs. *Nat. Commun.* **10**, 3393 (2019).
8. Falk, S. *et al.* Structural insights into the interaction of the nuclear exosome helicase Mtr4 with the preribosomal protein Nop53. *RNA N. Y. N* **23**, 1780–1787 (2017).

9. Wang, J. *et al.* NRDE2 negatively regulates exosome functions by inhibiting MTR4 recruitment and exosome interaction. *Genes Dev.* **33**, 536–549 (2019).
10. Sugiyama, T. & Sugioka-Sugiyama, R. Red1 promotes the elimination of meiosis-specific mRNAs in vegetatively growing fission yeast. *EMBO J.* **30**, 1027–1039 (2011).
11. James, P., Halladay, J. & Craig, E. A. Genomic libraries and a host strain designed for highly efficient two-hybrid selection in yeast. *Genetics* **144**, 1425–1436 (1996).
12. Thoms, M. *et al.* The Exosome Is Recruited to RNA Substrates through Specific Adaptor Proteins. *Cell* **162**, 1029–1038 (2015).
13. Tomlin, G. C., Wixon, J. L., Bolotin-Fukuhara, M. & Oliver, S. G. A new family of yeast vectors and S288C-derived strains for the systematic analysis of gene function. *Yeast Chichester Engl.* **18**, 563–575 (2001).
